# Supplementary material for: Assessing the effects of covalent, dative and halogen bonds on the electronic structure of selenoamides
Source: Royal Society of Chemistry journal article supplement (doi:10.1039/d2nj01421a), 2022-01-01
Supplement: d2nj01421a1.pdf [file d2nj01421a1.pdf]

**Electronic Supplementary Material (ESI) for New Journal of Chemistry**

**This journal is © The Royal Society of Chemistry and the Centre National de la Recherche Scientifique 2022**

**Assessing the effects of covalent, dative and halogen bond on the electronic structure of selenoamide**

*Gianluca Ciancaleoni,\* [a] Fabio Marchetti, [a] Claudio Santi,[b] Orsola Merlino,[b] Stefano Zacchini[c]*

[a] Prof. Dr. G. Ciancaleoni, Prof. Dr. F. Marchetti

Dipartimento di Chimica e Chimica Industriale, Università degli studi di Pisa, via Giuseppe Moruzzi 13, 56124, Italy

E-mail: gianluca.ciancaleoni@unipi.it

[b] Prof. Dr. C. Santi, O. Merlino

Dipartimento di Scienze Farmaceutiche, Università degli studi di Perugia, via del Liceo, 06132, Perugia, Italy

[c] Prof. Dr. S. Zacchini

Dipartimento di Chimica Fisica ed Inorganica, Università di Bologna, viale Risorgimento 4, 40136 Bologna, Italy

**SUMMARY**

|                            |     |
|----------------------------|-----|
| NMR spectra .....          | S2  |
| NMR titrations .....       | S5  |
| EXSY NMR .....             | S8  |
| Computational studies..... | S13 |

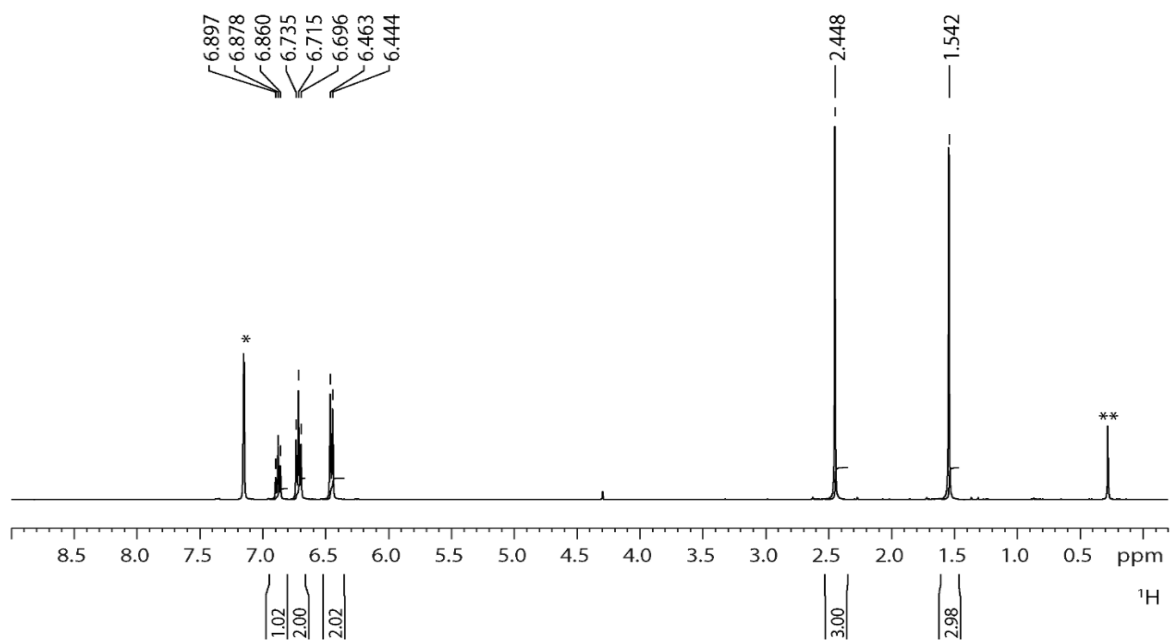

**Figure S1.**  $^1\text{H}$  NMR spectrum of **1-B** (solvent  $\text{C}_6\text{D}_6$ ). \* and \*\* denote the peaks relative to the residual non-deuterated solvent and silicon grease, respectively.

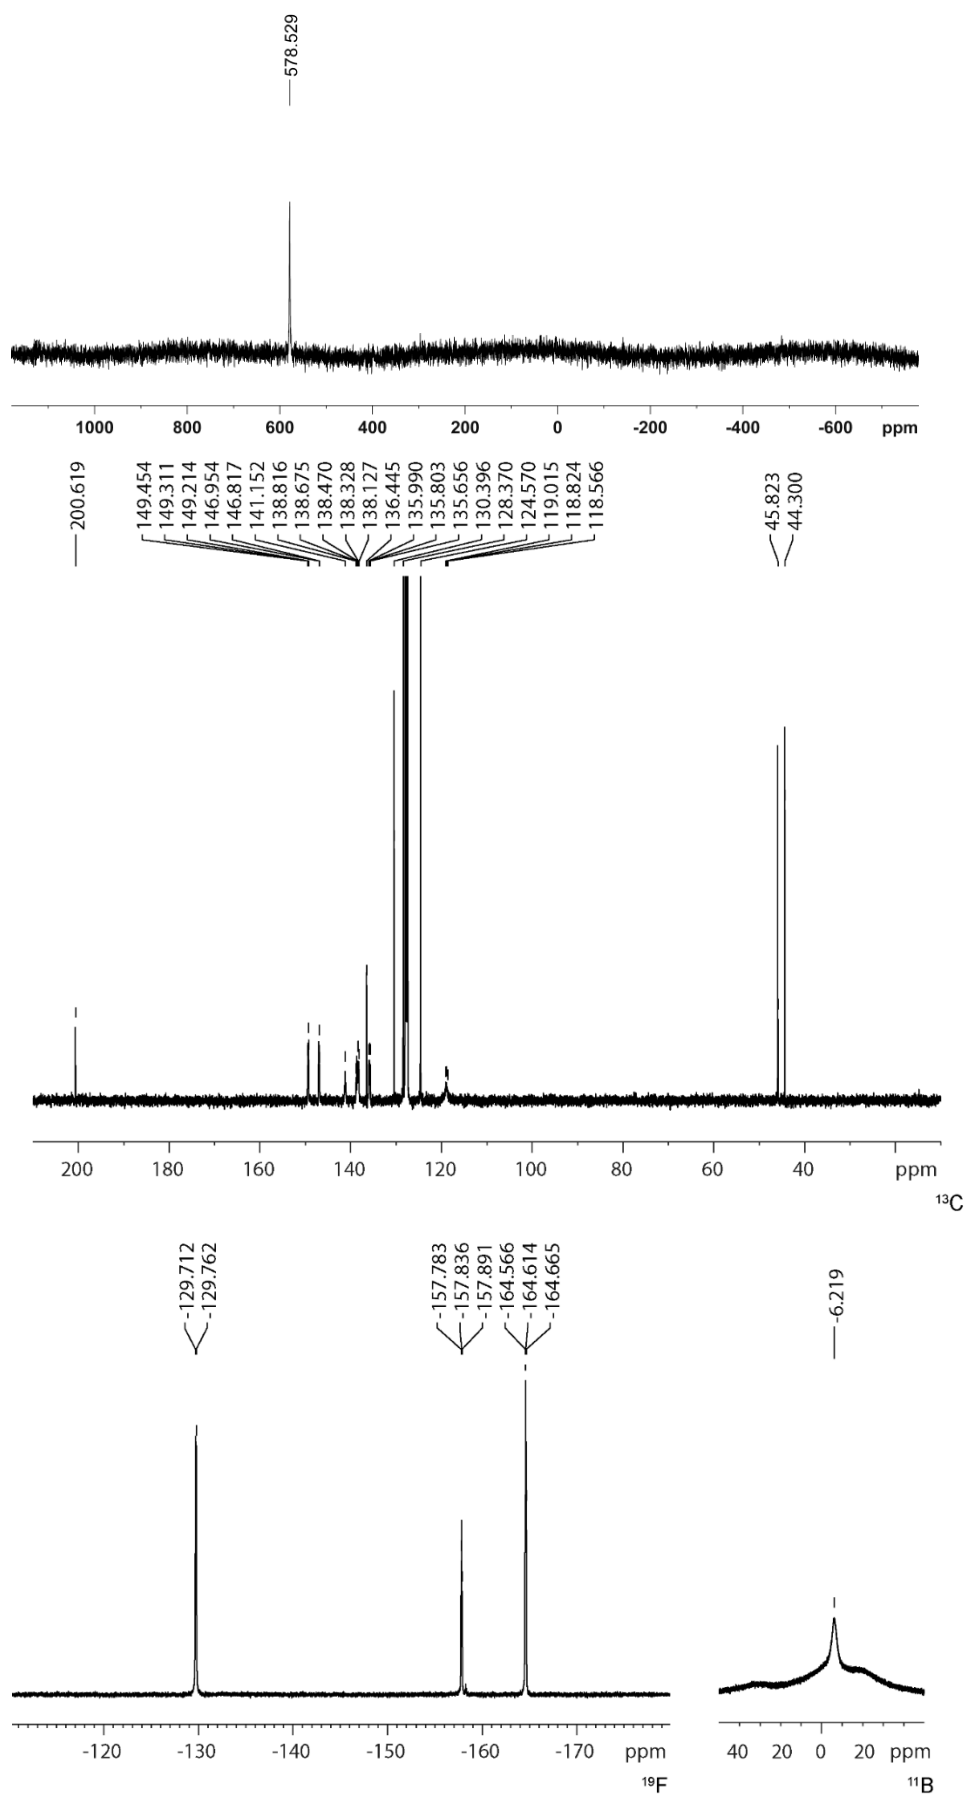

**Figure S2.**  $^{77}\text{Se}$ ,  $^{13}\text{C}$ ,  $^{19}\text{F}$  and  $^{11}\text{B}$  NMR spectra of **1-B** (solvent  $\text{C}_6\text{D}_6$ ). The

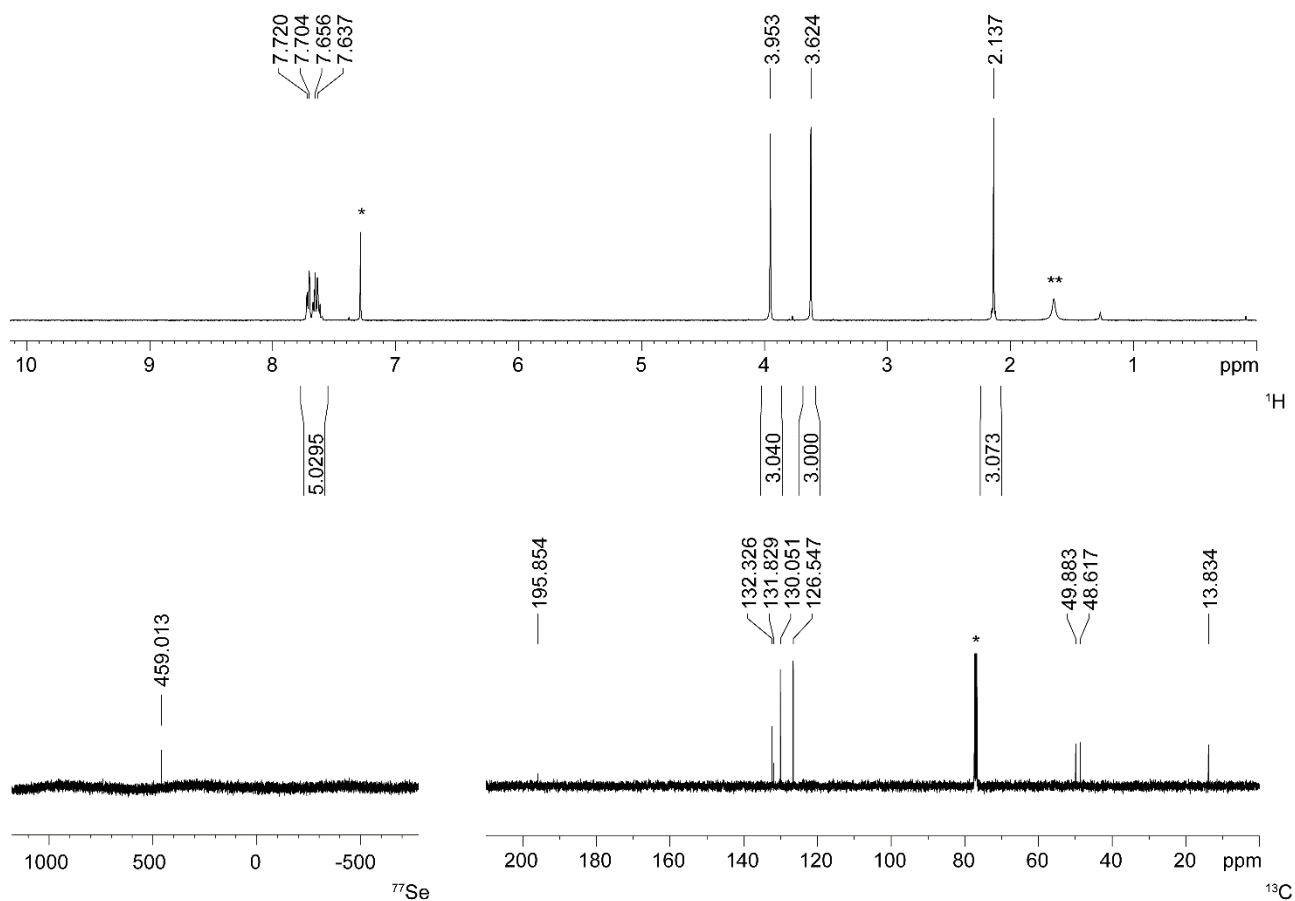

**Figure S3.** <sup>1</sup>H, <sup>77</sup>Se and <sup>13</sup>C{<sup>1</sup>H} NMR spectra of **1-Me<sup>+</sup>I<sup>-</sup>** (solvent CDCl<sub>3</sub>). \* and \*\* denote the peaks relative to the residual non-deuterated solvent and water, respectively.

## 2 NMR Titrations.

In all the cases, the data have been fitting using the equations described in the literature.<sup>[1]</sup>

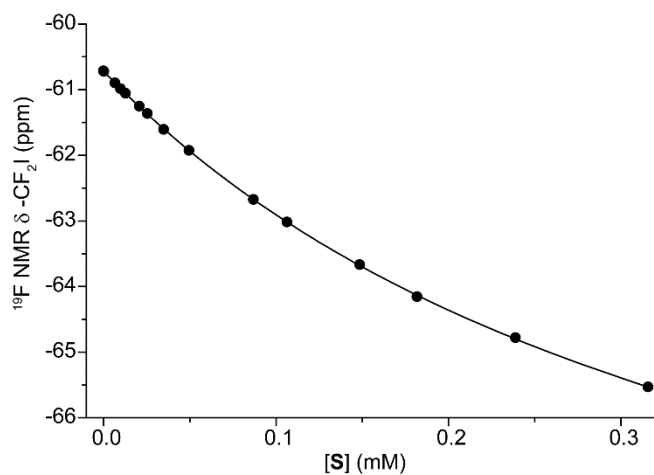

**Figure S4.** Trend of the chemical shift of the  $\alpha$ -fluorine nuclei ( $-\text{CF}_2\text{I}$ ) of **I** ( $C = 5.8 \text{ mM}$ ) with **[1]**  $T = 297.2 \text{ K}$ . The limit value of  $\delta$  (fitted) is  $-71.44 \pm 0.08 \text{ ppm}$ , the value of  $K_f$  is  $2.60 \pm 0.03 \text{ M}^{-1}$ .

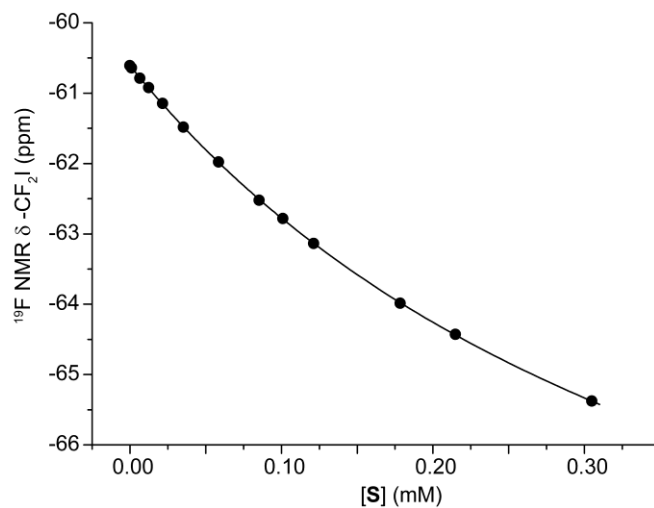

**Figure S5.** Trend of the chemical shift of the  $\alpha$ -fluorine nuclei ( $-\text{CF}_2\text{I}$ ) of **I** ( $C = 5.6 \text{ mM}$ ) with **[1]**;  $T = 303.0 \text{ K}$ . The limit value of  $\delta$  (fitted) is  $-72.05 \pm 0.07 \text{ ppm}$ , the value of  $K_f$  is  $2.36 \pm 0.02 \text{ M}^{-1}$ .

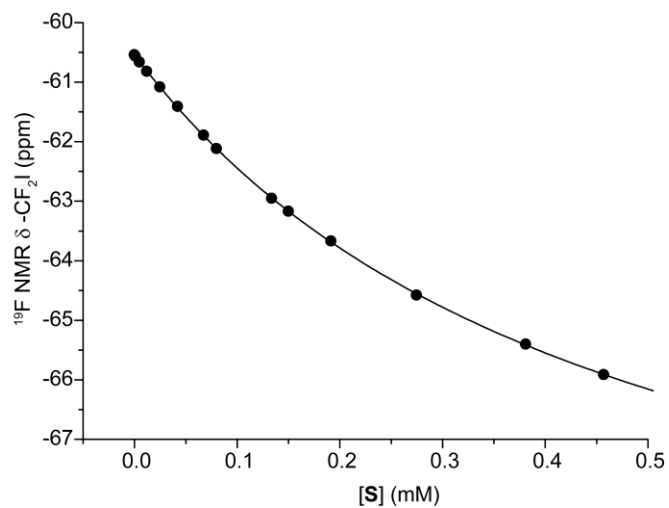

**Figure S6.** Trend of the chemical shift of the  $\alpha$ -fluorine nuclei (-CF<sub>2</sub>I) of **I** (C = 9.2 mM) with **[1]**; T = 309 K. The limit value of  $\delta$  (fitted) is  $-71.4 \pm 0.2$  ppm, the value of  $K_f$  is  $2.16 \pm 0.05$  M<sup>-1</sup>.

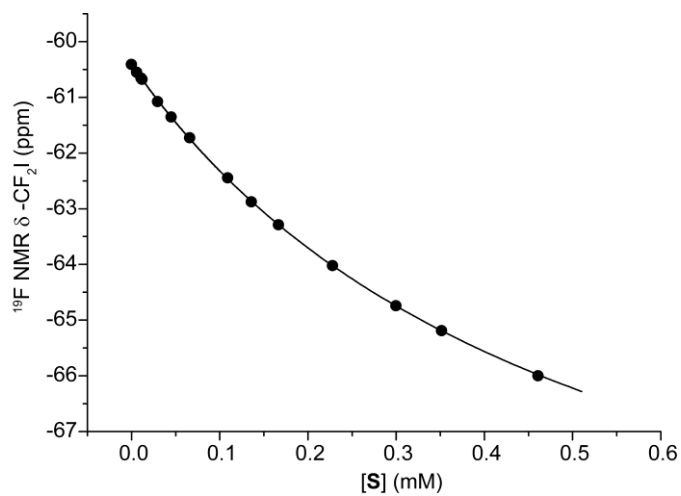

**Figure S7.** Trend of the chemical shift of the  $\alpha$ -fluorine nuclei (-CF<sub>2</sub>I) of **I** (C = 3.2 mM) with **[1]**; T = 317.2 K. The limit value of  $\delta$  (fitted) is  $-72.2 \pm 0.15$  ppm, the value of  $K_f$  is  $1.94 \pm 0.04$  M<sup>-1</sup>.

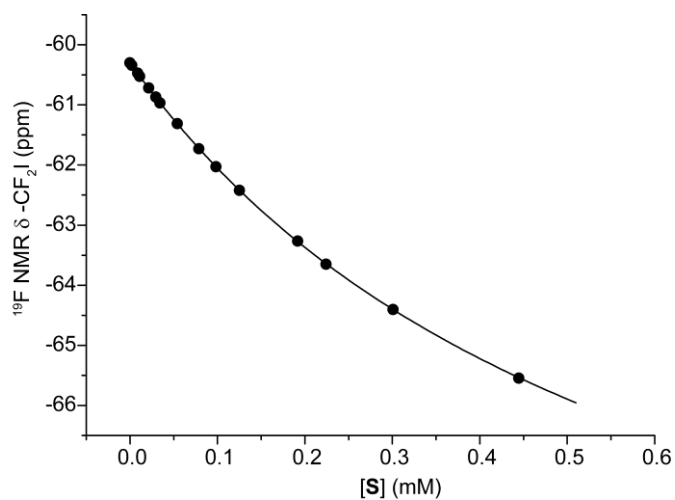

**Figure S8.** Trend of the chemical shift of the  $\alpha$ -fluorine nuclei ( $-\text{CF}_2\text{I}$ ) of **I** ( $C = 1.8$  mM) with **[1]**;  $T = 325$  K. The limit value of  $\delta$  (fitted) is  $-72.7 \pm 0.1$  ppm, the value of  $K_f$  is  $1.65 \pm 0.02$   $\text{M}^{-1}$ .

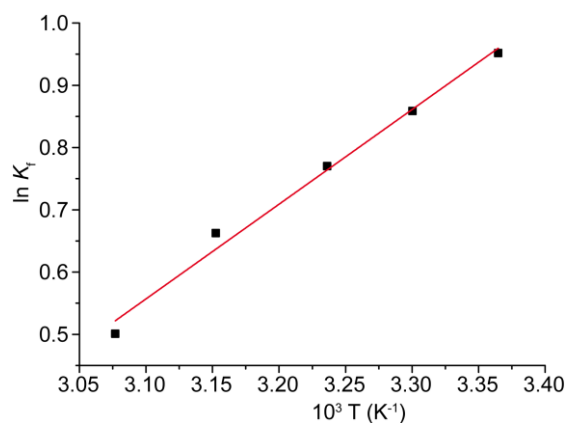

**Figure S9.** van't Hoff plot for the formation of XB **1**...**I** adduct. The slope of the fitting line is  $1521 \pm 90$ , the intercept  $-4.2 \pm 0.3$  ( $r^2 = 0.9868$ ).

### 3 EXSY NMR.

VT  $^1\text{H}$ -EXSY NMR experiments have been carried out through the noesygpph pulse sequence,<sup>[2,3]</sup> using a mixing time ( $\tau_m$ ) between 0.1 and 0.8 s, depending on the rate of the process.

**Table S1.**  $k_r$  values for **1**, **1 $\cdots$ I** and **1-B** derived from VT- $^1\text{H}$  EXSY NMR experiments at different temperature ( $T$ ) and mixing time ( $\tau_m$ ) values

| Compound                                       | $I_{AA}$ | $I_{BB}$ | $I_{AB}$ | $I_{BA}$ | $\tau_m$ | T (K) | $k_r$ ( $\text{s}^{-1}$ ) |
|------------------------------------------------|----------|----------|----------|----------|----------|-------|---------------------------|
| <b>1</b>                                       | 1.000    | 0.9846   | 0.0524   | 0.0594   | 0.80     | 298   | 0.141                     |
|                                                | 1.000    | 0.9934   | 0.0240   | 0.0250   | 0.20     | 303   | 0.246                     |
|                                                | 1.000    | 0.9964   | 0.0425   | 0.0410   | 0.35     | 303   | 0.239                     |
|                                                | 1.000    | 1.002    | 0.0799   | 0.0682   | 0.50     | 303   | 0.296                     |
|                                                | 1.000    | 0.9693   | 0.081    | 0.0674   | 0.30     | 309   | 0.579                     |
|                                                | 1.000    | 0.9789   | 0.1428   | 0.1418   | 0.50     | 309   | 0.503                     |
|                                                | 1.000    | 0.9564   | 0.2779   | 0.2842   | 0.5      | 317   | 1.18                      |
|                                                | 1.000    | 0.9624   | 0.3153   | 0.3208   | 0.30     | 325   | 2.24                      |
|                                                | 1.000    | 0.9638   | 0.1655   | 0.1794   | 0.15     | 325   | 2.37                      |
| <b>1<math>\cdots</math>I</b>                   | 1.000    | 0.9855   | 0.0498   | 0.0516   | 0.50     | 303   | 0.204                     |
| ([ <b>1</b> ] = 3.6 mM; [ <b>I</b> ] = 411 mM) | 1.000    | 0.9790   | 0.0358   | 0.0389   | 0.40     | 303   | 0.189                     |
|                                                | 1.000    | 0.9669   | 0.1214   | 0.1206   | 0.53     | 309   | 0.467                     |
|                                                | 1.000    | 0.9572   | 0.0825   | 0.0840   | 0.35     | 309   | 0.487                     |
|                                                | 1.000    | 0.9584   | 0.0394   | 0.0548   | 0.22     | 309   | 0.437                     |
|                                                | 1.000    | 0.9340   | 0.0624   | 0.0763   | 0.15     | 317   | 0.958                     |
|                                                | 1.000    | 0.9399   | 0.1292   | 0.1074   | 0.25     | 317   | 0.981                     |
|                                                | 1.000    | 0.9283   | 0.1031   | 0.1078   | 0.10     | 325   | 2.20                      |
|                                                | 1.000    | 0.9449   | 0.2495   | 0.2890   | 0.25     | 325   | 2.27                      |



|            |       |        |        |        |      |     |       |
|------------|-------|--------|--------|--------|------|-----|-------|
| <b>1-B</b> | 1.000 | 0.9458 | 0.0392 | 0.0390 | 0.30 | 343 | 0.268 |
|            | 1.000 | 0.9765 | 0.0725 | 0.0715 | 0.30 | 348 | 0.487 |
|            | 1.000 | 0.9585 | 0.1004 | 0.1071 | 0.30 | 353 | 0.709 |
|            | 1.000 | 0.9864 | 0.2856 | 0.2829 | 0.30 | 363 | 1.96  |

---

In the case of the **1-I** adducts, as the formation and disruption of the adduct is kinetically fast, the observed value  $k_r$  is the average value

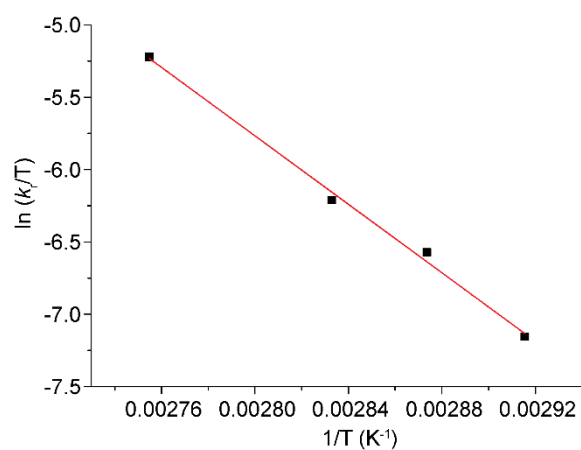

**Figure S10.** Eyring plot of the -NMe<sub>2</sub> rotation for **1-B**.

#### 4 PGSE NMR.

$^1\text{H}$  PGSE NMR measurements were performed by using the double-stimulated echo sequence with longitudinal eddy current delay<sup>[4]</sup> at 298 K without spinning. The dependence of the resonance intensity ( $I$ ) on a constant waiting time and on a varied gradient strength  $G$  is described by the following equation (3):

$$\ln \frac{I}{I_0} = (\gamma\delta)^2 D_t \left( \Delta - \frac{\delta}{3} \right) G^2 \quad (3)$$

where  $I$  is the intensity of the observed spin echo,  $I_0$  the intensity of the spin echo in the absence of gradient,  $D_t$  the self-diffusion coefficient,  $\Delta$  the delay between the midpoints of the gradients (0.2 s),  $\delta$  the length of the gradient pulse (4 ms), and  $\gamma$  the magnetogyric ratio. The shape of the gradients was rectangular, their length  $\delta$  was 4–5 ms, and their strength  $G$  was varied during the experiments.

The self-diffusion coefficient  $D_t$ , was estimated by evaluating the proportionality constant for a sample of HDO (5%) in  $\text{D}_2\text{O}$  [known diffusion coefficients in the range 274–318 K<sup>[5]</sup>] under the exact same conditions as the sample of interest. The solvent or TMS was taken as internal standard.

Since the aromatic protons of **S** overlap with the residual solvent peak of  $\text{C}_6\text{D}_6$ , the latter cannot be used as internal reference, as usually done.<sup>[6]</sup> For this reason, the hydrodynamic properties of dichloromethane in  $\text{C}_6\text{D}_6$  has been determined (Figure SX), in order to use  $\text{CH}_2\text{Cl}_2$  as internal standard for all the other measurements.

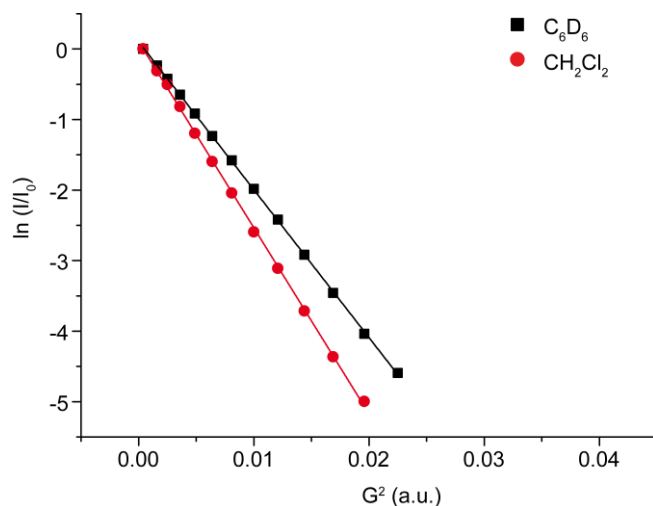

**Figure S11.** Plot of  $\ln(I/I_0)$  vs.  $G^2$  for a solution containing one drop of  $\text{CH}_2\text{Cl}_2$  in  $\text{C}_6\text{D}_6$  at 25°C.

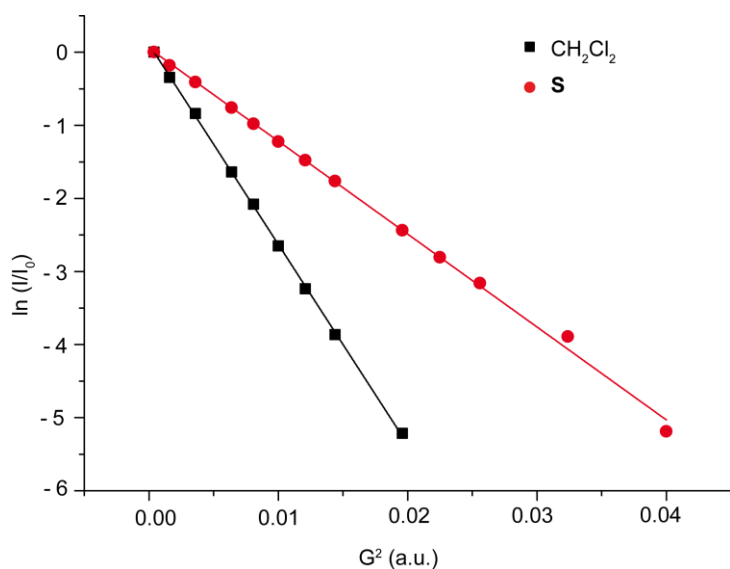

**Figure S12.** Plot of  $\ln(I/I_0)$  vs.  $G^2$  for a solution containing **1** (red circles, 3.2 mM) in  $\text{C}_6\text{D}_6$  at  $25^\circ\text{C}$ .  $\text{CH}_2\text{Cl}_2$  is used as internal reference (black squares).

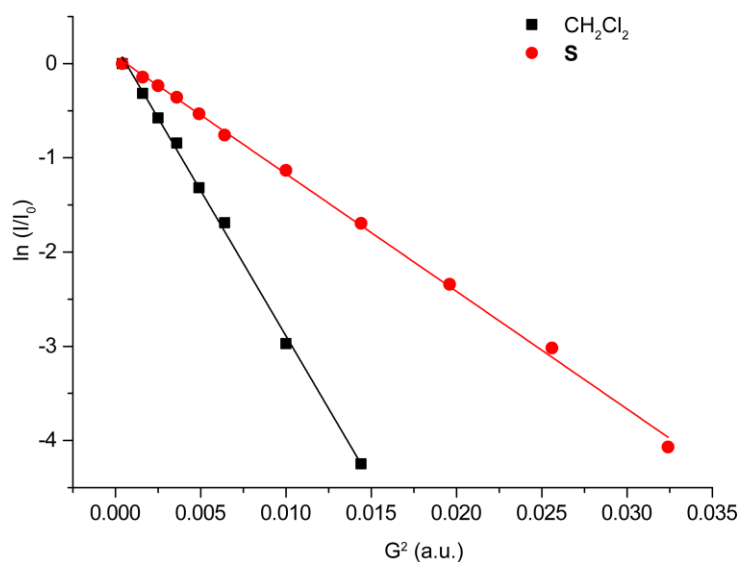

**Figure S13.** Plot of  $\ln(I/I_0)$  vs.  $G^2$  for a solution containing **1** (red circles, 3.2 mM) and **I** (247 mM) in  $\text{C}_6\text{D}_6$  at  $25^\circ\text{C}$ .  $\text{CH}_2\text{Cl}_2$  is used as internal reference (black squares).

**Table S2.** Diffusion coefficients ( $D_t$ ,  $10^{-10} \text{ m}^2\text{s}^{-1}$ ) and hydrodynamic volumes ( $V_H$ ,  $\text{\AA}^3$ ) at different concentrations of **1** and **I** (mM).

| [ <b>1</b> ] | [ <b>I</b> ] | $D_t$ ( <b>S</b> ) | $D_t$ ( $\text{CH}_2\text{Cl}_2$ ) | $V_H$ ( <b>S</b> ) |
|--------------|--------------|--------------------|------------------------------------|--------------------|
| 0.0          | 0.0          | -                  | 27.0                               | -                  |
| 42           | 0.0          | 13.0               | 28.1                               | 233                |
| 3.2          | 0.0          | 12.6               | 27.3                               | 230                |
| 3.2          | 247          | 11.2               | 27.7                               | 310                |

As it can be seen in Table S2, as an excess of **I** is added to a solution of **1**, the hydrodynamic volume of the latter increases from 230 to 310 Å<sup>3</sup>. Considering that the  $V_H$  of **I** (in absence of any aggregation process) is 220 Å<sup>3</sup>,<sup>[7]</sup> this means that the 37% of the molecules of **S** are involved in a XB adduct with a molecule of **I**. Consequently, the formation constant can be estimated to be 2.4 M<sup>-1</sup> (The experimental error on volumes is about 10%).

**Computational Studies.**

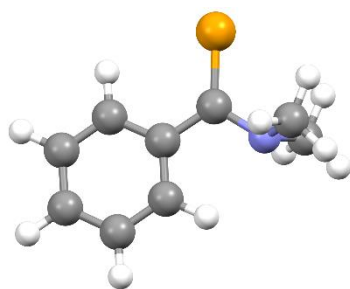

**TS(1)**

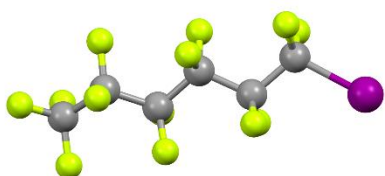

**TS(1-I<sup>1</sup>)**

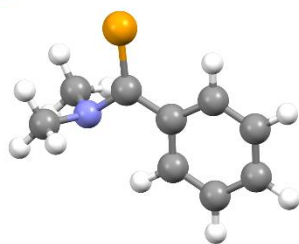

**TS(1-B)**

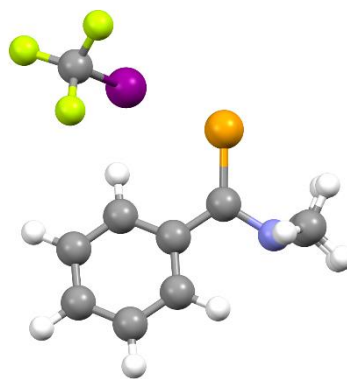

**TS (1-CF<sub>3</sub>)**

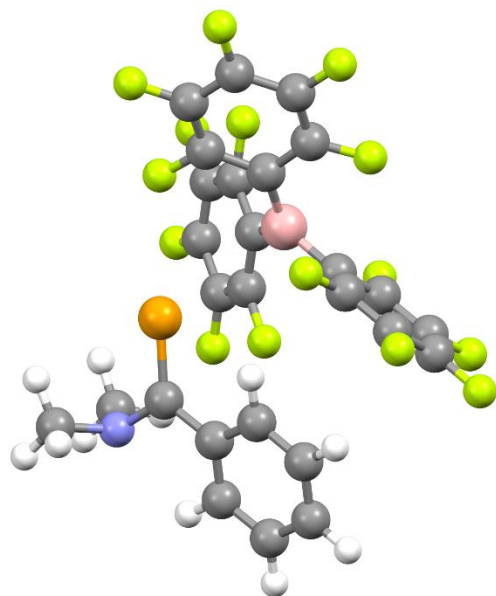

**TS(1-BCl<sub>3</sub>)**

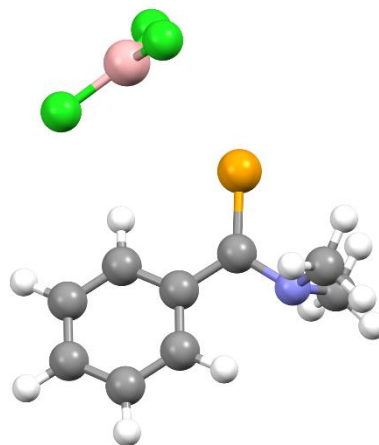

**Figure S14.** Optimized geometries for transition states.

### Natural Energy Decomposition Analysis (NEDA).

Given the density matrix, the NBO procedure calculates a set of mutually orthogonal bond orbitals (the NBOs) that, aside from small orthogonalization tails, are strictly localized either on single atoms (core orbitals, lone pairs) or on atom pairs (bonds, antibonds). The molecular fragments of a cluster are naturally defined by the connectivity of the bonds. NEDA employs the Fock matrix expressed in the NBO basis.

The binding energy of a complex formed by the association of two fragments is defined as

$$\Delta E = E(\psi_{AB}) - E(\psi_A) - E(\psi_B) \quad (1)$$

where  $\psi_{AB}$ ,  $\psi_A$ , and  $\psi_B$  are respectively the variationally optimized wave functions for the AB complex and the isolated fragments A and B. Furthermore, we constrain the geometries of A and B to remain unchanged during the association reaction so that geometries of fragments within the complex are identical to those at infinite separation. The binding energy therefore contains no contribution from the geometrical distortion of A and B during formation of the complex.

NEDA partitions the corrected binding energy into electrical (*EL*), charge transfer (*CT*) and repulsive (*CORE*) contributions

$$\Delta E = EL + CT + CORE \quad (2)$$

The key step of NEDA analysis is evaluation of perturbed ("deformed") wavefunctions ( $\psi_A^{(def)}$ ,  $\psi_B^{(def)}$ ) for each monomer as local eigenvectors of the NBO Fock matrix in the respective monomer blocks. (Each monomer wavefunction  $\psi_A^{(def)}$ ,  $\psi_B^{(def)}$  thereby inherits the overlap-free character of the underlying Natural Atomic Orbitals.) The antisymmetrized (determinantal) product of perturbed fragment wavefunctions

$$\psi^{(loc)} = \det|\psi_A^{(def)}\psi_B^{(def)}| \quad (3)$$

defines the starting "localized" ( $\psi^{(loc)}$ ) wavefunction that underlies evaluation of each NEDA component. *CT* is directly defined as

$$CT = E(\psi) - E(\psi^{(loc)}) \quad (4)$$

On the other hand, the difference between  $E(\psi^{(def)})$  and  $[E(\psi_A^{(def)}) + E(\psi_B^{(def)})]$  is defined as the sum of electrostatic (*ES*), polarization (*POL*) and exchange (*EX*) contributions.

The deformation energy (*DEF*) is evaluated as

$$DEF = [E(\psi_A^{(def)}) - E(\psi_A) + E(\psi_B^{(def)}) - E(\psi_B)] \quad (5)$$

In accordance with classical electrodynamics, one can employ linear response theory to evaluate the self-energy (*SE*) correction ("polarization penalty") for each center, thereby expressing the total electrical component as

$$EL = ES + POL + SE \quad (6)$$

However, the self-energy must then be removed (subtracted) from the deformation (*DEF*) penalty to obtain the net repulsive *CORE* component

$$CORE = EX + DEF - SE \quad (7)$$

**Extended Transition State-Natural Orbitals for Chemical Valence (ETS-NOCV) analysis.**<sup>[8]</sup> In the ETS-NOCV approach, the electron density rearrangement taking place upon formation of AB from fragments A and B is defined with respect to a reference system made up of the occupied  $\psi_i^A$  and  $\psi_i^B$  orbitals of A and B orthonormalized with respect to each other ( $\psi_i^0$ ). In other words, rather than two separate A and B determinants, their antisymmetrized product is taken as the fragment-fragment non-interacting reference (the so-called "promolecule"). The resulting electron density rearrangement,

$$\Delta\rho_{tot} = \sum_i |\psi_i^{AB}|^2 - |\psi_i^0|^2 \quad (8)$$

where  $\psi_i^{(AB)}$  is the set of occupied orbitals of the adduct, can be brought into diagonal form in terms of NOCVs. These are defined as the eigenfunctions,  $\phi_{\pm k}$ , of the so-called "valence operator"<sup>[9-11]</sup>

$$\hat{V} = \sum_i \left( |\psi_i^{(AB)}\rangle \langle \psi_i^{(AB)}| - |\psi_i^0\rangle \langle \psi_i^0| \right) \quad (9)$$

The fragmentation depends on the interaction under examination and is generally indicated in each case. The NOCVs can be grouped in pairs of complementary orbitals ( $\phi_k, \phi_{-k}$ ) corresponding to eigenvalues with same absolute value but opposite sign (Eq. 10).

$$\hat{V}\phi_{\pm k} = \pm v_k \phi_{\pm k} (v_k > 0) \quad (10)$$

where  $k$  numbers the NOCV pairs ( $k = 0$  for the largest value of  $|v_k|$ ). In this framework,  $\Delta\rho_{tot}$  can be defined as in Eq. 11.

$$\Delta\rho_{tot} = \sum_k v_k \quad (11)$$

Hence, on formation of AB from the promolecule, a fraction  $v_k$  of electrons is transferred from the  $\phi_{-k}$  to the  $\phi_k$  orbital. Only some NOCVs pairs have  $v_k$  significantly different from zero and this subgroup is generally enough to describe the A...B interaction. For each value of  $k$ , an energy contribution associated with the  $k$ -th NOCV pair is given.

The ETS-NOCV analysis has been performed with ORCA 4.1.0.

**Table S3.** Selected bond lengths (in Å) and components of NEDA (in kcal/mol) of partially optimized **1-Me<sup>+</sup>** structures, fixing the Se-Me bond length.

| Se-Me | C-Se  | N-C   | <i>CT</i> | <i>El</i> | <i>Core</i> | <i>E<sub>int</sub></i> |
|-------|-------|-------|-----------|-----------|-------------|------------------------|
| 1.964 | 1.892 | 1.309 | -394.01   | -93.65    | 329.99      | -157.67                |
| 2.298 | 1.881 | 1.31  | -233.3    | -77.55    | 177.52      | -133.33                |
| 2.631 | 1.876 | 1.311 | -147.92   | -59.83    | 99.34       | -108.41                |
| 2.946 | 1.87  | 1.311 | -103.01   | -45.55    | 59.1        | -89.46                 |
| 3.298 | 1.865 | 1.312 | -79.423   | -35.424   | 38.89       | -75.96                 |
| 3.631 | 1.86  | 1.313 | -67.18    | -27.45    | 27.7        | -66.93                 |
| 3.964 | 1.854 | 1.313 | -61.55    | -21.86    | 22.6        | -60.81                 |

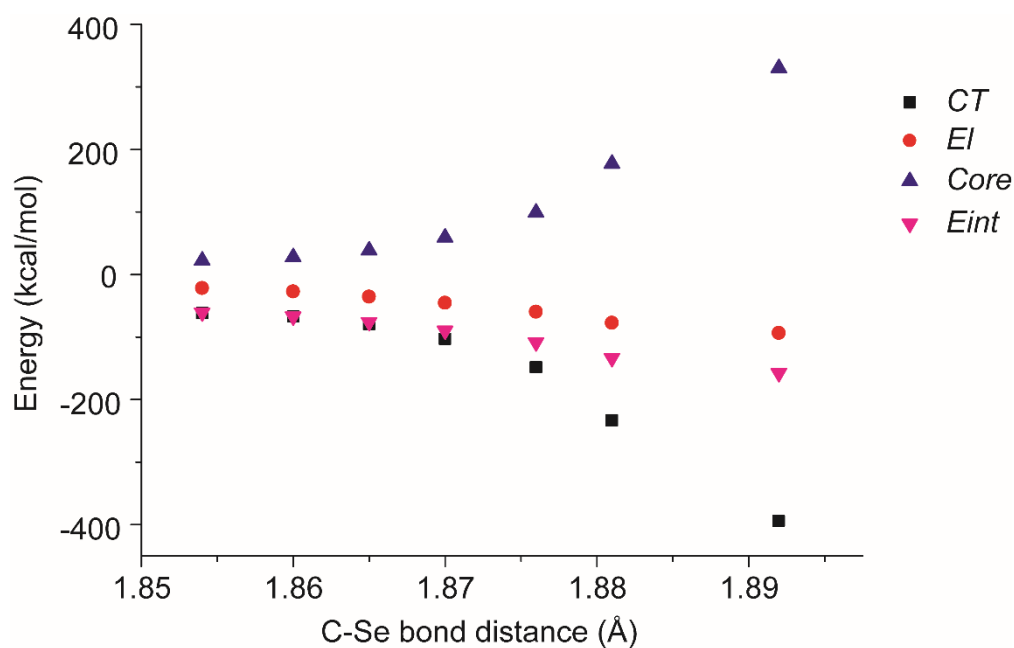

**Figure S15.** Trends of NEDA components *versus* the C-Se bond length.

**Table S4.** ETS-NOCV analysis of adducts, energies in kcal/mol

| Adduct                   | <i>E<sub>oi</sub></i> | <i>E<sub>1</sub></i> | <i>E<sub>2</sub></i> | <i>E<sub>int</sub></i> |
|--------------------------|-----------------------|----------------------|----------------------|------------------------|
| <b>1-ICF<sub>3</sub></b> | -9.6                  | -7.4                 | -0.6                 | -10.1                  |
| <b>1-BCl<sub>3</sub></b> | -82.8                 | -70.2                | -3.5                 | -36.7                  |



|                                          |        |        |       |        |
|------------------------------------------|--------|--------|-------|--------|
| <b>1-Me<sup>+</sup></b>                  | -211.6 | -184.7 | -10.0 | -162.1 |
| <b>ICF<sub>3</sub>···ICH<sub>3</sub></b> | -3.8   | -3.0   | -0.4  | -4.1   |

**Table S5.** Selected bond lengths (in Å) and components of NEDA (in kcal/mol) of TSs structures

| TS                           | Se-X  | C-Se  | N-C   | <i>CT</i> | <i>El</i> | <i>Core</i> | <i>E<sub>int</sub></i> |
|------------------------------|-------|-------|-------|-----------|-----------|-------------|------------------------|
| <b>TS(1-ICF<sub>3</sub>)</b> | 3.385 | 1.807 | 1.425 | -15.3     | -16.9     | 30.0        | -2.2                   |
| <b>TS(1-BCl<sub>3</sub>)</b> | 3.346 | 1.803 | 1.429 | -10.2     | -11.0     | 22.4        | 1.1                    |
| <b>TS(1-Me<sup>+</sup>)</b>  | 1.967 | 1.870 | 1.397 | -395.2    | -79.8     | 328.2       | -146.7                 |

### Optimized Cartesian Coordinates

#### 1-I<sup>1</sup>

|    |                   |                   |                   |
|----|-------------------|-------------------|-------------------|
| C  | 4.24729935724449  | 2.92963301795323  | -1.84742293846709 |
| C  | 3.89070158306746  | 2.41045804899205  | -0.60765990518250 |
| C  | 2.60564365017911  | 2.61206565099852  | -0.11659871274731 |
| C  | 1.68398223834881  | 3.33838910753834  | -0.85746646343911 |
| C  | 2.03443499043155  | 3.84971610552697  | -2.10888280396432 |
| C  | 3.32119191598463  | 3.63484363192468  | -2.60232072251992 |
| C  | 1.01395658163746  | 4.53296095959660  | -2.93773744605525 |
| N  | 0.47839780684913  | 5.66414809236428  | -2.48203169932361 |
| C  | 1.02545835505270  | 6.42466788465471  | -1.35795005345403 |
| Se | 0.51174610664976  | 3.75599435402960  | -4.52272562465555 |
| C  | -0.62149739754338 | 6.31757993679693  | -3.18295023889833 |
| H  | -0.25192238259477 | 6.87084975748493  | -4.04972124545358 |
| H  | -1.11006352169591 | 7.00520181833550  | -2.49461066125193 |
| H  | -1.32912604601887 | 5.57056795759488  | -3.53558565554340 |
| H  | 1.19876081445246  | 7.45321957369513  | -1.68015655229959 |
| H  | 1.96195081349580  | 5.99321535916076  | -1.02607574313060 |
| H  | 0.31856680403041  | 6.43456724437462  | -0.52555086243490 |
| H  | 3.57831220988612  | 4.00477988752616  | -3.58522007622252 |
| H  | 0.67703542032261  | 3.47917432606675  | -0.48533750516039 |
| H  | 2.31691990714264  | 2.19482552441246  | 0.83894054014721  |
| H  | 5.24335485516145  | 2.76649982139293  | -2.23761716499602 |
| H  | 4.60768355871684  | 1.84017483307676  | -0.03156371394283 |
| F  | 3.20443499424230  | -1.63262721478395 | -3.55321930603659 |
| F  | 1.96307144114855  | -1.40455745617201 | -1.77123570677223 |
| F  | -0.21033774305357 | -2.29796605924486 | -3.05993463989209 |
| F  | 0.84535559836114  | -2.29973090167308 | -4.98745758192668 |
| F  | 2.46068509543879  | -4.21027575112680 | -4.29194860181170 |
| F  | 1.97349986449290  | -4.04317041978838 | -2.16221906880121 |
| C  | 0.87792637190299  | -6.45569289278721 | -3.78510697018946 |

|   |                   |                   |                   |
|---|-------------------|-------------------|-------------------|
| F | -0.42884561809276 | -4.98287744606335 | -2.46547847815047 |
| F | -0.42581619779739 | -4.68415794378136 | -4.63705032847611 |
| C | -0.18887829282712 | -7.57282972808383 | -3.54506453093881 |
| F | 1.31637862226685  | -6.58001135272624 | -5.05149883047962 |
| F | 1.90274891500122  | -6.69091395750412 | -2.94014070492878 |
| F | 0.30855663007013  | -8.73874036068237 | -3.96721882758689 |
| F | -0.48449037148424 | -7.68436920185579 | -2.25012181783734 |
| F | -1.30750285832317 | -7.31249900351157 | -4.22718106689725 |
| I | 1.35205879819156  | 0.65671541702401  | -3.77059048363958 |
| C | 1.95032904124059  | -1.35842379961755 | -3.12207977907360 |
| C | 0.99266214296020  | -2.45906125391654 | -3.65627227782069 |
| C | 1.47791542363818  | -3.93165558844366 | -3.41065600890408 |
| C | 0.34009052182239  | -5.00034697875813 | -3.57403974084126 |

**TS(1-I<sup>1</sup>)**

|    |                   |                   |                   |
|----|-------------------|-------------------|-------------------|
| C  | 4.53221543151614  | 2.98099484751477  | -1.12510044748361 |
| C  | 4.43368412741678  | 3.42066627710025  | 0.19437367833605  |
| C  | 3.36184079275294  | 4.21869905579471  | 0.58214046522316  |
| C  | 2.39125127176699  | 4.57590609336195  | -0.33974842250269 |
| C  | 2.46180425513405  | 4.11745859926228  | -1.66791997334247 |
| C  | 3.55902337253581  | 3.32203959311841  | -2.04432333208572 |
| C  | 1.40591933918587  | 4.46905398373164  | -2.60827790150069 |
| N  | 0.52316361660928  | 5.50093180773547  | -2.17752310045199 |
| C  | 0.52731969447833  | 6.67359007588671  | -3.05265729620506 |
| Se | 1.16315607421584  | 3.65585601372192  | -4.20575514883865 |
| C  | -0.83111322787960 | 5.01590179194068  | -1.90466464712002 |
| I  | 1.78394794871157  | 0.41660748643628  | -3.58419795783766 |
| C  | 2.06571674509903  | -1.68750005836161 | -3.02820262334941 |
| C  | 1.06716082324778  | -2.62037479904899 | -3.77219109879748 |
| C  | 1.35048194886651  | -4.15460174942095 | -3.59169809981318 |
| C  | 0.13006453473702  | -5.06290625538248 | -3.97823516679632 |
| F  | 3.32555298571622  | -2.07291031692685 | -3.32452764975492 |
| F  | 1.89250438485790  | -1.81970993395204 | -1.69910379877914 |
| F  | -0.17616056686363 | -2.35166251833762 | -3.31797382148618 |
| F  | 1.12000814439091  | -2.35022591764639 | -5.09148845430031 |
| F  | 2.40207024283637  | -4.48718715449084 | -4.36810994406239 |
| F  | 1.66582622201700  | -4.40614321136084 | -2.30625219261793 |
| H  | -1.35599253052675 | 4.70885585725515  | -2.81866967318095 |
| H  | -1.39188249132844 | 5.81536360695980  | -1.41848428436420 |
| H  | -0.78548694833355 | 4.16261757284396  | -1.22810482004002 |
| H  | 0.08258040082310  | 6.46715194434512  | -4.03462266851754 |
| H  | 1.55087222550072  | 7.01732811405971  | -3.19746642207921 |
| H  | -0.03829727615492 | 7.46730526281978  | -2.56317277821025 |
| H  | 3.63866793215934  | 2.99358242892158  | -3.06974724133787 |
| H  | 1.56413946546621  | 5.20900534155565  | -0.05605599311692 |

|   |                   |                   |                   |
|---|-------------------|-------------------|-------------------|
| H | 3.28664857414439  | 4.56664891542382  | 1.60418346719877  |
| H | 5.37259866826190  | 2.37299914974916  | -1.43345876694301 |
| H | 5.19529610351681  | 3.14811770572232  | 0.91405302368568  |
| C | 0.52436353089039  | -6.55566620867779 | -4.23846821688383 |
| F | -0.76938012895188 | -5.02144781162548 | -2.97416828873302 |
| F | -0.44721273432211 | -4.58374713104064 | -5.09773508382711 |
| C | -0.68186948799618 | -7.54987335476854 | -4.22312822266967 |
| F | 1.10963162755076  | -6.64753972489228 | -5.44680167034097 |
| F | 1.39631598790497  | -6.96679356251383 | -3.29510446458008 |
| F | -0.26051896576607 | -8.73929829680393 | -4.66117277385962 |
| F | -1.16453787808052 | -7.70025866676486 | -2.99001534323616 |
| F | -1.65874723610728 | -7.11849585324520 | -5.02518384539737 |

### 1-I<sup>2</sup>

|    |                   |                  |                   |
|----|-------------------|------------------|-------------------|
| C  | 1.88689201299763  | 1.54954938862828 | -3.19851186552770 |
| C  | 3.13374742649144  | 1.78945389649603 | -2.62950467821468 |
| C  | 3.32085834201482  | 2.90367431476006 | -1.81880689831912 |
| C  | 2.27116306717668  | 3.78326187347580 | -1.59359624735456 |
| C  | 1.01442923791429  | 3.54324704951380 | -2.15741509145533 |
| C  | 0.82770816317410  | 2.41113027456868 | -2.95249330968334 |
| C  | -0.11490364791370 | 4.45277986226309 | -1.86034962996275 |
| N  | 0.04062722305402  | 5.75259040831589 | -2.10328378450139 |
| C  | 1.05706902221519  | 6.29300037196463 | -3.00809795119150 |
| Se | -1.66184898492031 | 3.73937760615178 | -1.16016664064996 |
| C  | -0.94801735675470 | 6.73486666565589 | -1.67180383622920 |
| I  | -2.5475222442308  | 4.39011277112008 | -4.35139685114822 |
| C  | -2.85926516301917 | 4.84493721783104 | -6.48050015173280 |
| C  | -1.58990209968213 | 5.49250389178570 | -7.10493509581993 |
| C  | -1.64318935300673 | 5.67876222480899 | -8.66244085494270 |
| C  | -0.56366044614555 | 6.67949635737884 | -9.20752143585173 |
| F  | -3.15161435407309 | 3.71723357391601 | -7.16272211646403 |
| F  | -3.89851026465291 | 5.69225965667697 | -6.61053214110588 |
| F  | -1.40903128683843 | 6.70465129868403 | -6.52963227279120 |
| F  | -0.52218843493102 | 4.71724219943097 | -6.82412500826266 |
| F  | -1.44844672830179 | 4.47555514112059 | -9.23991995791297 |
| F  | -2.85650765293728 | 6.13994174882215 | -9.01980535516226 |
| H  | -1.77640931567698 | 6.78302787828264 | -2.38176825795902 |
| H  | -0.46091391802936 | 7.70781475759933 | -1.61945840413992 |
| H  | -1.34550402453735 | 6.45440536261924 | -0.70054967014966 |
| H  | 0.55094407064697  | 6.85968953559368 | -3.79245630952199 |
| H  | 1.62893755553405  | 5.49415618961680 | -3.46430895578388 |
| H  | 1.73140797270349  | 6.96239961734684 | -2.47042815877089 |
| H  | -0.14916488301393 | 2.21701266088002 | -3.37124227319369 |
| H  | 2.41577422543275  | 4.64759640379155 | -0.95768156764430 |
| H  | 4.28356575967963  | 3.08699593446987 | -1.35940533979214 |

|   |                   |                  |                    |
|---|-------------------|------------------|--------------------|
| H | 1.73590345708391  | 0.68229239576723 | -3.82820966650407  |
| H | 3.95422241126895  | 1.10718335634881 | -2.81152771624068  |
| C | -0.30902348548936 | 6.54329799686167 | -10.74671787337276 |
| F | -0.97420324838458 | 7.93722274108273 | -8.94639992737907  |
| F | 0.60662124835338  | 6.46662264401346 | -8.57162810314553  |
| C | 0.43107628409148  | 7.76396527679580 | -11.38360200747283 |
| F | 0.44523793156760  | 5.45114098640849 | -10.96827399503204 |
| F | -1.48529465432822 | 6.40382986704825 | -11.39090471032093 |
| F | 0.78368795546175  | 7.44724890512162 | -12.63172656375305 |
| F | -0.35940835271503 | 8.83589722294382 | -11.42541569673732 |
| F | 1.53315851291258  | 8.06145947403885 | -10.68865362880224 |

### TS(1-I<sup>2</sup>)

|    |                   |                  |                    |
|----|-------------------|------------------|--------------------|
| C  | 1.75512031745737  | 1.05248534781180 | 0.64216420400711   |
| C  | 2.77439401428591  | 1.80125783678114 | 1.23136531089783   |
| C  | 3.12754215452391  | 3.03300921817203 | 0.69329409134366   |
| C  | 2.46979298144440  | 3.51765692867433 | -0.42647600179258  |
| C  | 1.44199904661003  | 2.77439680669943 | -1.03391215637119  |
| C  | 1.09826318341594  | 1.52959367085823 | -0.47481775158731  |
| C  | 0.77128553974490  | 3.30825839450471 | -2.21772835444847  |
| N  | 1.21909530285047  | 4.58831686128338 | -2.64124524176879  |
| C  | 1.88121330942559  | 4.57733400588294 | -3.94592170472532  |
| Se | -0.53489435611261 | 2.41455352045142 | -3.09432431832582  |
| C  | 0.20405306634063  | 5.63375295147771 | -2.51232592210633  |
| I  | -1.73789933944949 | 4.04144039020824 | -5.79513402613635  |
| C  | -2.62030672734782 | 5.01047328190534 | -7.55958068878490  |
| C  | -1.59015238993175 | 5.92972692339222 | -8.27578583676969  |
| C  | -2.07286986131860 | 6.51128200481052 | -9.65195055032139  |
| C  | -1.21777781630939 | 7.73237805590212 | -10.14424097437763 |
| F  | -3.05483022306852 | 4.07870875562299 | -8.43465846006242  |
| F  | -3.68105462969708 | 5.74753155423836 | -7.17572603105166  |
| F  | -1.29956513062169 | 6.95899086576883 | -7.44897782287031  |
| F  | -0.46424322480724 | 5.22391459172549 | -8.50602377094844  |
| F  | -2.00085814643476 | 5.53193780587144 | -10.57651900382748 |
| F  | -3.35332746079011 | 6.91525813746054 | -9.54771044371176  |
| H  | -0.63621333357156 | 5.49865997477884 | -3.20257803800190  |
| H  | 0.67630074616211  | 6.59639287752895 | -2.71332040579523  |
| H  | -0.18051994053612 | 5.64354566096286 | -1.49251030738980  |
| H  | 1.19584735003951  | 4.36220279307725 | -4.77323211839883  |
| H  | 2.67214121214028  | 3.82719766362448 | -3.94418974954602  |
| H  | 2.33385427253475  | 5.55659021361315 | -4.10654613816519  |
| H  | 0.30890891713861  | 0.95025357019625 | -0.93255585011487  |
| H  | 2.73198323617353  | 4.47246818693020 | -0.85521948709381  |
| H  | 3.91784856804955  | 3.61718135635355 | 1.14694080659881   |
| H  | 1.47647537548380  | 0.09443776263018 | 1.06073015801746   |

|   |                   |                   |                    |
|---|-------------------|-------------------|--------------------|
| H | 3.28755193334033  | 1.42308652306319  | 2.10632899876034   |
| C | -1.38146076152678 | 8.03233001316040  | -11.67231094814301 |
| F | -1.58961927906042 | 8.82551672836609  | -9.44709592599264  |
| F | 0.08714957789525  | 7.49086315033354  | -9.90622746170612  |
| C | -0.87958456399948 | 9.44836631039865  | -12.10434115603696 |
| F | -0.67957143845624 | 7.12259897737454  | -12.37287116227224 |
| F | -2.68257051352567 | 7.94387939429322  | -12.01594873170943 |
| F | -0.86999604285463 | 9.51002978114873  | -13.43841219036812 |
| F | -1.68485919767448 | 10.40431691048824 | -11.64238129779379 |
| F | 0.35985727203756  | 9.66671324217448  | -11.65594454110937 |

**1-I<sup>3</sup>**

|    |                  |                  |                   |
|----|------------------|------------------|-------------------|
| C  | 3.77462381905801 | 1.59690649049220 | -0.58365271682531 |
| C  | 2.56709591863025 | 1.10971768824469 | -0.09415355025260 |
| C  | 1.39602392544587 | 1.82343928222608 | -0.32090804545964 |
| C  | 1.43477655421352 | 3.02396344497387 | -1.01814043409938 |
| C  | 2.64437848120633 | 3.52106113326617 | -1.51155478801790 |
| C  | 3.81265071095100 | 2.78653615074581 | -1.29466088118871 |
| C  | 2.68016025044897 | 4.76515363811506 | -2.31975115307203 |
| N  | 2.08950012121249 | 5.86460100750661 | -1.83173960691912 |
| C  | 1.70290286342180 | 6.04555572981043 | -0.43444683182199 |
| Se | 3.47302537131344 | 4.70962230627760 | -3.96495840407406 |
| C  | 1.97876000884627 | 7.06685087647059 | -2.64799259859687 |
| F  | 4.75260046191563 | 5.64669135398369 | 0.02114982954202  |
| C  | 5.41917707280675 | 5.18767842034383 | 1.09481208255672  |
| C  | 6.05229693120518 | 6.39798079172690 | 1.84800860713632  |
| C  | 6.81321430445991 | 7.39508195744963 | 0.90101627469837  |
| C  | 7.80160058104231 | 8.34320815386336 | 1.66540270623291  |
| I  | 4.06027943489749 | 4.07821988241275 | 2.37884773401560  |
| F  | 6.38746270097710 | 4.36556581216646 | 0.67079301122337  |
| F  | 5.07571470131511 | 7.08702543818203 | 2.46889656445097  |
| F  | 6.90850317005814 | 5.91739195738749 | 2.77118435820792  |
| F  | 7.51740944251788 | 6.69759844234653 | -0.00880846637107 |
| F  | 5.89564873713448 | 8.14697261223734 | 0.25880086733120  |
| H  | 2.95235871832248 | 7.55084312033280 | -2.76014575493738 |
| H  | 1.28403141637190 | 7.75089685514271 | -2.16255717745952 |
| H  | 1.62204573746624 | 6.80861792391443 | -3.64286391278061 |
| H  | 2.20424411595084 | 6.93194491369694 | -0.03954387037644 |
| H  | 1.99119886232292 | 5.18933029237725 | 0.16087362090407  |
| H  | 0.62357703298240 | 6.19411087365432 | -0.35066466362413 |
| H  | 4.74372131214824 | 3.15829726254742 | -1.69822399824362 |
| H  | 0.51689685409331 | 3.56631601443859 | -1.20542864678433 |
| H  | 0.44831684489097 | 1.44219946423447 | 0.03737332501912  |
| H  | 4.69117370074138 | 1.04723888400439 | -0.41238416581401 |
| H  | 2.53752249735619 | 0.17591337433498 | 0.45223160056933  |

|   |                   |                   |                   |
|---|-------------------|-------------------|-------------------|
| C | 8.20182865684944  | 9.61295813074517  | 0.84063520635893  |
| F | 7.22596660856137  | 8.75371747627388  | 2.81308249203079  |
| F | 8.91569902468404  | 7.64608110298977  | 1.96390527715338  |
| C | 9.47332567230875  | 10.34792501247713 | 1.37544803687079  |
| F | 8.44339995932663  | 9.26399419156327  | -0.43897650127172 |
| F | 7.18014288625798  | 10.48845309157971 | 0.87215193964824  |
| F | 9.58532831288551  | 11.52071571213362 | 0.74784626586303  |
| F | 9.36935057900701  | 10.57061599263454 | 2.68853784835689  |
| F | 10.57248564439445 | 9.63315474069548  | 1.13946351982041  |

**TS(1-F<sup>3</sup>)**

|    |                  |                   |                   |
|----|------------------|-------------------|-------------------|
| C  | 3.64119578998891 | 1.49268153928814  | -0.51139601464201 |
| C  | 2.42306650793987 | 1.48616232210558  | 0.16799658112554  |
| C  | 1.56506649878344 | 2.57349584992288  | 0.05680246883362  |
| C  | 1.91848364159964 | 3.66263744764863  | -0.72633913880962 |
| C  | 3.14655045392041 | 3.68925961869239  | -1.40822809444242 |
| C  | 4.00002414414102 | 2.57800672045960  | -1.28727329773457 |
| C  | 3.51461678649743 | 4.86590374286450  | -2.19847835738456 |
| Se | 5.11169837040819 | 5.07831472915725  | -2.99988061867775 |
| N  | 2.50566384116800 | 5.87428461773728  | -2.28251707223716 |
| C  | 2.87733462727363 | 7.11991641527271  | -1.61320709064930 |
| C  | 2.02473791956794 | 6.09451003194322  | -3.64531051620709 |
| H  | 2.78774502926635 | 6.54642730910727  | -4.29274331196053 |
| H  | 1.15510996665080 | 6.75208843190288  | -3.60219079572945 |
| H  | 1.71691060656055 | 5.14380586431306  | -4.08064670521665 |
| H  | 3.70316656730519 | 7.63842250219151  | -2.11822592957626 |
| H  | 3.17635644571498 | 6.91039524054491  | -0.58718855647328 |
| H  | 2.00380611022308 | 7.77335397739470  | -1.59284498022169 |
| H  | 4.94679697775791 | 2.59170972302872  | -1.80815439903862 |
| H  | 1.26151384482161 | 4.51356863391423  | -0.82330353168577 |
| H  | 0.61839815531124 | 2.57447580988069  | 0.58159311481547  |
| H  | 4.31167480271408 | 0.64695162250353  | -0.42774596118207 |
| H  | 2.14755544273915 | 0.63608385684239  | 0.77938473331973  |
| I  | 4.93459041568953 | 3.14396740100011  | 3.05412695286769  |
| C  | 5.32076135761318 | 4.74835223349603  | 1.64021762630783  |
| C  | 6.12400717861455 | 5.90957986777184  | 2.30144441192495  |
| C  | 6.25198116825824 | 7.18359570220127  | 1.38947203416643  |
| C  | 7.38829958913732 | 8.16253563990253  | 1.84968069201836  |
| C  | 7.24134072854499 | 9.60336937437318  | 1.25369413651582  |
| C  | 8.53960073815890 | 10.46943056908547 | 1.34521359714939  |
| F  | 4.15067081008104 | 5.23371810752343  | 1.19000974832376  |
| F  | 6.01103571910023 | 4.25899473582433  | 0.60515052043824  |
| F  | 5.50554212046544 | 6.27574024644240  | 3.43946309749208  |
| F  | 7.35790207834131 | 5.45340552373573  | 2.59623194333803  |
| F  | 6.50793708133250 | 6.80744829171947  | 0.12425221934757  |

|   |                  |                   |                   |
|---|------------------|-------------------|-------------------|
| F | 5.07340886335530 | 7.84102588598257  | 1.41701689509580  |
| F | 7.37422611358190 | 8.26157927537883  | 3.19386790950469  |
| F | 8.57403688026549 | 7.65168819048624  | 1.46353350171465  |
| F | 6.89969721537546 | 9.52282006179256  | -0.04788838764088 |
| F | 6.27083097775502 | 10.25326215575092 | 1.92286283007056  |
| F | 8.23822984800804 | 11.72665020185677 | 1.01118964610258  |
| F | 9.02398287167058 | 10.45953312039227 | 2.59004451866319  |
| F | 9.47486471429775 | 10.02099540856804 | 0.50921758037372  |

**1-B**

|    |                   |                   |                    |
|----|-------------------|-------------------|--------------------|
| C  | 3.74889050154444  | 3.01846432932140  | -4.72999174205580  |
| C  | 3.02462380091306  | 1.86084018959401  | -4.43772048631402  |
| C  | 3.47773014300797  | 1.16580682377031  | -3.31752197012029  |
| C  | 4.53860653496317  | 1.59102217985322  | -2.52980966798147  |
| C  | 5.21491096291079  | 2.74992673332625  | -2.86097245041778  |
| C  | 4.82195151619979  | 3.46363267898416  | -3.98163713107799  |
| B  | 1.85402757481462  | 1.34829567511774  | -5.39711948512719  |
| C  | 0.89808695745658  | 0.17034604028339  | -4.85930737173193  |
| C  | 0.22168702812667  | 0.25302545863762  | -3.64131788179716  |
| C  | -0.65603502056763 | -0.70429812441185 | -3.17080293884030  |
| C  | -0.87591226852508 | -1.85182984071890 | -3.91814357472114  |
| C  | -0.20051381834152 | -2.00888324451656 | -5.11537682079885  |
| C  | 0.66452251473651  | -1.01441617223015 | -5.55774026411654  |
| C  | 2.19935055736042  | 1.31066583762531  | -6.97124611437236  |
| C  | 3.49894014935267  | 1.21151427514977  | -7.46703103213015  |
| C  | 3.80175818182075  | 1.16200574833500  | -8.82148107919547  |
| C  | 2.78129915365671  | 1.19543275006596  | -9.75603337856942  |
| C  | 1.46844581308166  | 1.26036313795265  | -9.31483270378432  |
| C  | 1.21178145486398  | 1.30239086809855  | -7.95590834147577  |
| F  | 4.55509968537422  | 1.12401432871582  | -6.63921131227253  |
| F  | 5.07163540469286  | 1.07505821113939  | -9.22918483148312  |
| F  | 3.05482275612415  | 1.15234707199929  | -11.05955485807370 |
| F  | 0.46698454456602  | 1.26480140712575  | -10.20025601523897 |
| F  | -0.08899534111218 | 1.30614518876398  | -7.60200430719933  |
| F  | 0.41542246527391  | 1.31274045343777  | -2.82945793891780  |
| F  | -1.28189814037452 | -0.54025197282977 | -1.99725333214719  |
| F  | -1.71133660308047 | -2.79282259380375 | -3.47986477714667  |
| F  | -0.38204243880761 | -3.11851796876023 | -5.83623160124226  |
| F  | 1.29449172819745  | -1.27822019433281 | -6.71365649230165  |
| F  | 2.92069131058053  | -0.00020229482688 | -2.94534482769470  |
| F  | 4.90990411607032  | 0.88942958923262  | -1.45218545990893  |
| F  | 6.22665143900673  | 3.18325389664310  | -2.10696452265192  |
| F  | 5.48192568787495  | 4.57631077477382  | -4.32245454938783  |
| F  | 3.43009272890070  | 3.75465191541155  | -5.80663851852640  |
| Se | 0.15897168367954  | 3.14555612427256  | -5.41472574459368  |

|   |                   |                  |                   |
|---|-------------------|------------------|-------------------|
| C | 0.07321599705482  | 3.93428372836267 | -3.73420744816043 |
| N | -1.08328918504173 | 4.05061347622430 | -3.10259165956255 |
| C | -1.28360904949878 | 4.91041617078468 | -1.93137479386214 |
| C | 1.27750487854797  | 4.50361028805791 | -3.09933649189578 |
| C | 1.95388788452015  | 5.55127244319922 | -3.72681581161519 |
| C | 3.04608371643216  | 6.14137576797303 | -3.10701110465291 |
| C | 3.49376098584692  | 5.66577517403552 | -1.87968010886828 |
| C | 2.84275744949476  | 4.59953154948751 | -1.26769206122054 |
| C | 1.72937160581329  | 4.02719259175129 | -1.86520089315587 |
| C | -2.30510278131532 | 3.39353368198436 | -3.56565062980394 |
| H | -2.83943719167382 | 4.03103903325433 | -4.27308656700153 |
| H | -2.93870046002121 | 3.20622841005020 | -2.70012456495824 |
| H | -2.05472592641604 | 2.46107768597555 | -4.06184784566338 |
| H | -2.18424234835659 | 5.50369013585380 | -2.09345329348669 |
| H | -0.43558445736480 | 5.56925327717702 | -1.79027904187677 |
| H | -1.42174871339323 | 4.30000147234123 | -1.03729542924603 |
| H | 1.61857025970511  | 5.89331123647149 | -4.69566866460113 |
| H | 1.22262354080927  | 3.19871498893212 | -1.39043256641563 |
| H | 3.20514920953384  | 4.20993451730482 | -0.32560063919750 |
| H | 3.56342044835603  | 6.95598864189154 | -3.59508139910231 |
| H | 4.36140137262505  | 6.11060644768733 | -1.41082546223854 |

**TS(1-B)**

|   |                   |                   |                    |
|---|-------------------|-------------------|--------------------|
| C | 4.14879288962178  | 2.62078257758114  | -4.99114266284995  |
| C | 3.46203746055049  | 1.43508470885360  | -4.71886504100992  |
| C | 3.94425320401688  | 0.70659057205599  | -3.62804496410142  |
| C | 5.00779203874020  | 1.12463454321518  | -2.84640834548538  |
| C | 5.64343945425029  | 2.31998718594245  | -3.14683595484535  |
| C | 5.21437101671651  | 3.06816053588741  | -4.23195167186396  |
| B | 2.27272623463573  | 0.93250300659952  | -5.60695463142428  |
| C | 1.10355733374645  | 0.10598177495343  | -4.96886011168562  |
| C | 0.63378344606700  | 0.33261699134030  | -3.66983679409843  |
| C | -0.40260508995118 | -0.38760190866892 | -3.10319488618412  |
| C | -1.00688848660289 | -1.40423925222859 | -3.82898367284089  |
| C | -0.56252940979165 | -1.68599542939681 | -5.11215880933646  |
| C | 0.46841257027072  | -0.93624149535914 | -5.65353352675362  |
| C | 2.34592814635257  | 1.13024615136769  | -7.16309326056984  |
| C | 3.55245332719181  | 1.04504292176605  | -7.86316890835733  |
| C | 3.64716680033153  | 1.20425020034299  | -9.23599610317532  |
| C | 2.50145865299376  | 1.47484472052984  | -9.96968194727621  |
| C | 1.27738913603977  | 1.56473383544004  | -9.32139062633087  |
| C | 1.21958486248112  | 1.37909775521269  | -7.95125081370274  |
| F | 4.69530841567483  | 0.76669102820934  | -7.21740202024576  |
| F | 4.82381266041690  | 1.10088360131833  | -9.85641443482537  |
| F | 2.57399228065866  | 1.64099008615098  | -11.28576693520090 |



|    |                   |                   |                    |
|----|-------------------|-------------------|--------------------|
| F  | 0.17281254306949  | 1.82034235670966  | -10.02390025583592 |
| F  | 0.00726723559599  | 1.45880958473119  | -7.38858766192124  |
| F  | 1.18100177025322  | 1.28292100499419  | -2.90348574243074  |
| F  | -0.81887018963167 | -0.12556909453278 | -1.86126145756956  |
| F  | -1.99516368675936 | -2.11051335423375 | -3.29221256597865  |
| F  | -1.12509310583701 | -2.67659629003214 | -5.80539044548693  |
| F  | 0.86556363592925  | -1.28538268460387 | -6.88452883199830  |
| F  | 3.39886096616874  | -0.47512737183536 | -3.30564974256884  |
| F  | 5.42916414444069  | 0.39002379087700  | -1.81542374392998  |
| F  | 6.65942575948466  | 2.74441184094921  | -2.40239801907904  |
| F  | 5.82613264918024  | 4.21969109083834  | -4.52526102006453  |
| F  | 3.77685954808927  | 3.40011413569971  | -6.01493002069720  |
| Se | 0.13489878153301  | 3.56262433866577  | -5.09710501217808  |
| C  | 0.01217176110996  | 4.24735159021520  | -3.43160155625305  |
| N  | -1.25071183590571 | 4.34887375845706  | -2.77744851492464  |
| C  | -2.19896257790625 | 5.21966931679960  | -3.47196963072946  |
| C  | 1.15412196211738  | 4.70849824544898  | -2.64978025674418  |
| C  | 2.40219601712610  | 4.95891494273249  | -3.24549453223215  |
| C  | 3.46688059308524  | 5.40978995973777  | -2.48734550146252  |
| C  | 3.31935274972511  | 5.59906320353775  | -1.11438599683392  |
| C  | 2.09054932805454  | 5.35669549068911  | -0.50885329833236  |
| C  | 1.01251372534278  | 4.93221574611824  | -1.26849226875100  |
| C  | -1.83200633370141 | 3.04899045962218  | -2.44249803736617  |
| H  | -2.13724631528591 | 2.48745855104037  | -3.33625311328709  |
| H  | -2.70627238354017 | 3.21412536901447  | -1.81180616078950  |
| H  | -1.11001725342521 | 2.45408108866637  | -1.88528157382633  |
| H  | -2.53429084114243 | 4.79997329050150  | -4.42884239175071  |
| H  | -1.73699307055670 | 6.18870198363695  | -3.65751574588323  |
| H  | -3.06357809225749 | 5.36588774807243  | -2.82371643314328  |
| H  | 2.50515680678886  | 4.82088596732101  | -4.31264307373091  |
| H  | 0.04669765067874  | 4.76537963487661  | -0.81566574185182  |
| H  | 1.97095338680485  | 5.51058776681120  | 0.55591389554730   |
| H  | 4.41356071728172  | 5.62615322382173  | -2.96403243622406  |
| H  | 4.15670800967818  | 5.94795820353843  | -0.52345598952800  |

#### Free 1

|   |                   |                  |                   |
|---|-------------------|------------------|-------------------|
| C | 1.88836307667943  | 1.57888223786532 | -3.23718542987630 |
| C | 3.12860623711273  | 1.78311434715152 | -2.64036228871821 |
| C | 3.31448133081981  | 2.87029791790589 | -1.79362283412186 |
| C | 2.27128243305013  | 3.75558458657606 | -1.55726153522925 |
| C | 1.02086692150373  | 3.55055731589084 | -2.14711348404748 |
| C | 0.83701175445815  | 2.44878635659638 | -2.98355349979005 |
| C | -0.10818878086011 | 4.46095562510388 | -1.83242358672039 |
| N | 0.03993612909572  | 5.76300068903165 | -2.10981789877609 |
| C | 1.06362318392726  | 6.29280027252541 | -3.00780557170319 |

|    |                   |                  |                   |
|----|-------------------|------------------|-------------------|
| Se | -1.59321814293078 | 3.76274055797084 | -1.03514518592211 |
| C  | -0.96996480543922 | 6.72990974067675 | -1.70092853677596 |
| H  | -1.86052300766875 | 6.65057530665066 | -2.32972510295833 |
| H  | -0.54719275533984 | 7.72971186978835 | -1.79045236650962 |
| H  | -1.27284947271134 | 6.53747138876842 | -0.67403809584934 |
| H  | 0.57685746099546  | 6.83009865294037 | -3.82555179748896 |
| H  | 1.66256329419507  | 5.49062477669162 | -3.42242567359310 |
| H  | 1.71684802633370  | 6.98947133342511 | -2.47725504585640 |
| H  | -0.13833378845775 | 2.27757155077071 | -3.41785390755350 |
| H  | 2.41568032499148  | 4.59805671915165 | -0.89224250194440 |
| H  | 4.27176443150479  | 3.02805906296854 | -1.31338398539733 |
| H  | 1.73596724265135  | 0.73218795919001 | -3.89442372325113 |
| H  | 3.94290672263057  | 1.09504753646999 | -2.82849420070677 |

#### TS(1)

|    |                   |                  |                   |
|----|-------------------|------------------|-------------------|
| C  | 3.94510041914061  | 2.10740849005546 | -2.19241060669499 |
| C  | 3.40308777520733  | 1.56683332632373 | -1.02582128129984 |
| C  | 2.29987434375996  | 2.16994198355543 | -0.43347842101268 |
| C  | 1.73917242642368  | 3.30581009219266 | -0.99913465472818 |
| C  | 2.27333867205188  | 3.86245219209976 | -2.17396968663895 |
| C  | 3.38903423472179  | 3.23777338602194 | -2.76002378100422 |
| C  | 1.66465415577726  | 5.06206970109421 | -2.75290586626369 |
| N  | 0.54794084283607  | 5.57895135634716 | -2.02519125363291 |
| C  | 0.79105879838132  | 6.90784631478142 | -1.46700657010526 |
| Se | 2.24133440977446  | 5.85762813609663 | -4.26160697751888 |
| C  | -0.70581137576328 | 5.51295697541924 | -2.77460966139442 |
| H  | -0.71323400945578 | 6.19068694342976 | -3.63837218102173 |
| H  | -1.52359388870246 | 5.77987113470381 | -2.10308946103307 |
| H  | -0.86685962265847 | 4.49506776547780 | -3.13000847929467 |
| H  | 0.87998073505250  | 7.67892144422295 | -2.24389783356442 |
| H  | 1.71034542456514  | 6.89681659630653 | -0.88125731742278 |
| H  | -0.03902854430011 | 7.16050821536444 | -0.80533311595426 |
| H  | 3.80466480216509  | 3.65998225582080 | -3.66387102405904 |
| H  | 0.88323403318227  | 3.78524449188115 | -0.54956047219824 |
| H  | 1.87543871993465  | 1.75530939723338 | 0.47164550633791  |
| H  | 4.80420841066882  | 1.64068196493440 | -2.65660079877767 |
| H  | 3.84151223723725  | 0.68096383663735 | -0.58426406271799 |

#### 1-Me<sup>+</sup>

|    |                   |                  |                  |
|----|-------------------|------------------|------------------|
| Se | 0.49826615051560  | 5.63037037236387 | 6.43486951041406 |
| N  | -1.76939776852074 | 4.24835744622874 | 5.68278955169784 |

|   |                   |                  |                  |
|---|-------------------|------------------|------------------|
| C | -1.03780446967410 | 5.29457262491956 | 5.39827333943919 |
| C | 1.34957673998640  | 7.04928705616975 | 5.38089661045061 |
| C | -1.37911452480079 | 6.19507528382979 | 4.28733063673180 |
| C | -1.26637117093441 | 5.73796324420740 | 2.97104247992438 |
| C | -1.54822981485973 | 6.59810945449459 | 1.91898132016893 |
| C | -1.95777176794693 | 7.90264255064496 | 2.17454286405096 |
| C | -2.07605540134546 | 8.35484512411589 | 3.48514595719088 |
| C | -1.77410284816119 | 7.50988371623893 | 4.54326422325308 |
| C | -3.06858131876917 | 3.97775197785374 | 5.04522424475873 |
| C | -1.37972194999075 | 3.29665386874522 | 6.73018227062494 |
| H | -0.94550861661417 | 4.72296717578839 | 2.77419220084814 |
| H | -1.44997354370458 | 6.24819974600467 | 0.90003429435267 |
| H | -2.18325816188685 | 8.56792529852978 | 1.35191100314098 |
| H | -2.40080603585757 | 9.36720835654308 | 3.68378035842394 |
| H | -1.85791304216613 | 7.86092070726632 | 5.56409036502914 |
| H | 2.35908432172405  | 7.10665708122173 | 5.78241808486574 |
| H | 1.37410168720419  | 6.75810686608636 | 4.33587306151055 |
| H | 0.82833997749320  | 7.98930909414293 | 5.52302513816767 |
| H | -3.37696859418762 | 4.82278319319010 | 4.44184809253112 |
| H | -3.80159880843851 | 3.79765527945511 | 5.83049346527869 |
| H | -2.98685092352746 | 3.08642171226234 | 4.42276363731855 |
| H | -1.55477001403753 | 3.72997409143780 | 7.71722197011598 |
| H | -1.97690977329821 | 2.39623838145195 | 6.62398039827322 |
| H | -0.32485832820152 | 3.04250629680684 | 6.62686392143810 |

#### TS(1-Me<sup>+</sup>)

|    |                   |                  |                  |
|----|-------------------|------------------|------------------|
| Se | 0.54258679469981  | 4.38505403322163 | 5.18496589738791 |
| N  | -2.15222397069835 | 4.51280094992236 | 5.62782012327010 |
| C  | -1.13270901623599 | 5.15331216271046 | 4.92115482343526 |
| C  | 1.94571441886095  | 5.57223910422583 | 4.49678180189021 |
| C  | -1.45817728065307 | 6.30125326232471 | 4.13945606488302 |
| C  | -0.62232852657334 | 6.81491836607127 | 3.11990724532987 |
| C  | -0.99828487818403 | 7.93048607664771 | 2.40449389850859 |
| C  | -2.20297426139112 | 8.57387230772673 | 2.69585834519983 |
| C  | -3.05213327893618 | 8.07394736661963 | 3.68207888591397 |
| C  | -2.70138651496226 | 6.93859769000105 | 4.38109230127394 |
| C  | -2.41029685462462 | 3.11234718247567 | 5.25663395906217 |
| C  | -2.15497386547392 | 4.75507551133865 | 7.08019663252530 |
| H  | 0.28227160969753  | 6.29778703945853 | 2.84814753934313 |
| H  | -0.36792070193919 | 8.29905058550086 | 1.60674745934937 |
| H  | -2.48840346050339 | 9.45543182851388 | 2.13664484424390 |
| H  | -3.99215064361923 | 8.56661086900714 | 3.88918364164163 |
| H  | -3.36172451800429 | 6.52318417470577 | 5.12646956774052 |
| H  | 2.82104985137982  | 5.30591979918448 | 5.08586237935029 |
| H  | 2.13150223944784  | 5.37350313095651 | 3.44558146735412 |

|   |                   |                  |                  |
|---|-------------------|------------------|------------------|
| H | 1.66811247027876  | 6.60768317609258 | 4.67165368057754 |
| H | -2.43429332635040 | 3.01913635715244 | 4.17255514649468 |
| H | -3.38968825930858 | 2.84059662475812 | 5.64792433687979 |
| H | -1.66586907495889 | 2.41825593229648 | 5.66340290363764 |
| H | -2.01719813257400 | 5.81675163719766 | 7.27925349229926 |
| H | -3.12627917719377 | 4.45114563338759 | 7.46891672094999 |
| H | -1.36941964217985 | 4.19342519850111 | 7.59825584145715 |

#### Free CH<sub>3</sub><sup>+</sup>

|   |                  |                  |                  |
|---|------------------|------------------|------------------|
| C | 1.47781486326742 | 7.22583641158960 | 5.25555517118144 |
| H | 2.36966573265782 | 7.03975222894900 | 5.85773436737401 |
| H | 1.31895951122178 | 6.67035189149143 | 4.32885155042297 |
| H | 0.74466261926082 | 7.96741956559073 | 5.58007180601614 |

#### Free I

|   |                   |                   |                   |
|---|-------------------|-------------------|-------------------|
| F | 3.20032854995721  | -1.62138000687389 | -3.56224035847800 |
| F | 1.97509078738148  | -1.40879737288536 | -1.77559102571670 |
| F | -0.21047109546420 | -2.29145110870226 | -3.06135571559803 |
| F | 0.84390835013794  | -2.29147373964299 | -4.98743853571626 |
| F | 2.46082027848849  | -4.20267022452827 | -4.29410650334064 |
| F | 1.97258680695585  | -4.03667920808878 | -2.16482506492088 |
| C | 0.87825829672670  | -6.45643900837706 | -3.78346379833558 |
| F | -0.43196336231742 | -4.97583184051519 | -2.47138594859691 |
| F | -0.42114673728806 | -4.68105454492524 | -4.64343186387277 |
| C | -0.18933722031693 | -7.57308129032336 | -3.54318553732899 |
| F | 1.32076222711934  | -6.58011802159743 | -5.04797368452151 |
| F | 1.90104775038870  | -6.68452803217016 | -2.93471141067694 |
| F | 0.30930057676009  | -8.73867928729179 | -3.96105379569670 |
| F | -0.48776244891787 | -7.67864468802916 | -2.24891891638174 |
| F | -1.30502246509208 | -7.31145622246295 | -4.22943715554679 |
| I | 1.34263843635823  | 0.61514551580713  | -3.75437118777475 |
| C | 1.95884740622430  | -1.37040496308228 | -3.11487811981415 |
| C | 0.98599334007297  | -2.46142866008378 | -3.66003144287904 |
| C | 1.47746998839075  | -3.93324369085504 | -3.41283326527425 |
| C | 0.33849291363404  | -5.00097549886894 | -3.57728142053382 |

#### Free B

|   |                   |                  |                    |
|---|-------------------|------------------|--------------------|
| F | -3.17521791433037 | 2.69278490792203 | -6.55011851684313  |
| F | -3.31589579597990 | 1.27445428040193 | -8.81576004915000  |
| F | -2.30859215562264 | 2.28658724568040 | -11.12569908138642 |
| F | -1.14238214900891 | 4.73894374153242 | -11.15016774128968 |
| F | -0.96900809107358 | 6.17004237314982 | -8.89506026030158  |
| F | -1.92684054840386 | 7.97601611607039 | -5.11033999407984  |
| F | 0.28909449269086  | 9.37526048074784 | -4.56707357435920  |
| F | 2.73453397230324  | 8.32881919827233 | -5.11560257903619  |

|   |                   |                  |                    |
|---|-------------------|------------------|--------------------|
| F | 2.94680552902455  | 5.86350993087194 | -6.23483199843435  |
| F | 0.74579897176822  | 4.45252167708633 | -6.81154625856582  |
| F | -4.78667664320043 | 5.40534556280508 | -7.04263866608960  |
| F | -6.82837758858507 | 5.43609661892984 | -5.31225962463019  |
| F | -6.35601056042996 | 5.37000802878408 | -2.63978309922245  |
| F | -3.80752402433049 | 5.28149573022621 | -1.70293499352117  |
| F | -1.74623116101476 | 5.26889639564571 | -3.41015507543311  |
| B | -1.97636211904917 | 5.32806966064298 | -6.30422486554162  |
| C | -2.98507953888998 | 5.31929684472787 | -3.91942858955865  |
| C | -3.17427476082211 | 5.33770316704342 | -5.30360785344439  |
| C | -4.50297092056813 | 5.36652859072579 | -5.73336901701753  |
| C | -5.57594878416323 | 5.38859015301540 | -4.85908011175308  |
| C | -5.33803138936844 | 5.35963968309579 | -3.49102613582445  |
| C | -4.03362738109476 | 5.31906079487967 | -3.01594187385738  |
| C | -0.68928064189320 | 6.15110349478450 | -5.98536284212885  |
| C | -0.74313497750955 | 7.41642592453211 | -5.39620640626619  |
| C | 0.38750750417308  | 8.16234417818811 | -5.11063911164106  |
| C | 1.63964178855366  | 7.63265487950997 | -5.39456687876837  |
| C | 1.74399689851743  | 6.37340855729311 | -5.97113208454953  |
| C | 0.59069933200098  | 5.66606651171310 | -6.26405938942185  |
| C | -2.06541156786349 | 4.49541837419440 | -7.62120312256290  |
| C | -2.66866230730862 | 3.23615255840178 | -7.66559163251338  |
| C | -2.74914852933962 | 2.48069178875366 | -8.82266693407791  |
| C | -2.23129943249380 | 2.99318232069938 | -10.00500875646406 |
| C | -1.63131299925443 | 4.24572140266371 | -10.01259292913073 |
| C | -1.54916405431967 | 4.96363882689750 | -8.83176886944836  |

### 1-ICF<sub>3</sub>

|    |                   |                  |                   |
|----|-------------------|------------------|-------------------|
| C  | -1.10210919899910 | 0.32034129425678 | -4.88848610647857 |
| C  | -0.14076112238671 | 1.29051185461806 | -4.62873938076560 |
| C  | -0.52601341920752 | 2.51689204723603 | -4.10085199389461 |
| C  | -1.86446823044559 | 2.77760071402113 | -3.84326401838773 |
| C  | -2.83370020985951 | 1.80331197620152 | -4.10002265222687 |
| C  | -2.43894761351690 | 0.56968137002124 | -4.61626643483727 |
| C  | -4.24715946229035 | 2.04042252094250 | -3.72251300800635 |
| N  | -4.88741936375411 | 3.07506705936974 | -4.26806118776113 |
| C  | -4.39430792595717 | 3.82075370001895 | -5.42696726025608 |
| Se | -5.01880464606146 | 0.94198651619174 | -2.46772239193458 |
| C  | -6.23250425152109 | 3.43839155556946 | -3.83204214585199 |
| H  | -6.96677935201805 | 2.72721535096131 | -4.21753162991999 |
| H  | -6.45921777982903 | 4.43443606481577 | -4.20637914130686 |
| H  | -6.28461581031724 | 3.41991551304451 | -2.74563086431824 |
| H  | -5.16386775350259 | 3.81842556991375 | -6.20178226130767 |
| H  | -3.49433542178484 | 3.36472048961967 | -5.82030854050103 |
| H  | -4.18014003265024 | 4.85482975901801 | -5.14859419531289 |

|   |                   |                   |                   |
|---|-------------------|-------------------|-------------------|
| H | -3.18411933177251 | -0.19773360342018 | -4.77526199864205 |
| H | -2.15628247962479 | 3.72482452725776  | -3.40782834537429 |
| H | 0.22057036532394  | 3.26637191064748  | -3.87281360598901 |
| H | -0.80887508971939 | -0.64166895202025 | -5.28866895711866 |
| H | 0.90552680191931  | 1.08553206455044  | -4.81656704938482 |
| F | 0.30300366599148  | -1.08594161340442 | 0.10970492358285  |
| F | 0.87787406719196  | 0.64789672212909  | -1.05321348082816 |
| I | -2.04750540201763 | 0.34729883306311  | -0.95237946374541 |
| C | -0.02229210075191 | 0.18659024251780  | -0.16453515891820 |
| F | 0.12343109756099  | 0.89756651285902  | 0.96525634948523  |

**1-ICF<sub>3</sub> (TS)**

|    |                   |                   |                   |
|----|-------------------|-------------------|-------------------|
| C  | -1.80918433704341 | 0.73849232177419  | -5.44485842068530 |
| C  | -1.24486982353507 | 1.77178065738769  | -6.19118653774448 |
| C  | -1.72151970383482 | 3.07165780946833  | -6.05044288807197 |
| C  | -2.76331000212310 | 3.33713010250086  | -5.17911221212465 |
| C  | -3.31922644371427 | 2.31245909798445  | -4.39039495972937 |
| C  | -2.81992266169028 | 1.00670519817897  | -4.53940275620497 |
| C  | -4.39669677738813 | 2.62591271481225  | -3.46114679889989 |
| N  | -5.05701557108558 | 3.86460349775153  | -3.70370388693920 |
| C  | -6.47673274422092 | 3.71280847455143  | -4.01669230346331 |
| Se | -4.88122304650436 | 1.56481713952741  | -2.08147200526920 |
| C  | -4.81132355573087 | 4.87553891865134  | -2.67699311707982 |
| I  | -1.95042035995732 | 0.39490899147218  | -0.85746063819351 |
| C  | -0.00045790603713 | 0.07049523426955  | 0.07192801187442  |
| F  | -0.07411502666577 | 0.21152177699027  | 1.40153312313262  |
| F  | 0.46800713676631  | -1.15923038475538 | -0.18080086138509 |
| F  | 0.89522019921327  | 0.95732550132616  | -0.38675254046559 |
| H  | -5.30211786809974 | 4.63441408006835  | -1.72422628736037 |
| H  | -5.18754492195549 | 5.83295041647195  | -3.03997937658525 |
| H  | -3.74031049677779 | 4.96869351361283  | -2.50096709344851 |
| H  | -7.06395551536825 | 3.37677973470776  | -3.15167610204112 |
| H  | -6.59918135031587 | 2.98997278993578  | -4.82244140038515 |
| H  | -6.85872977457527 | 4.67634271404214  | -4.35622985364495 |
| H  | -3.26189419602752 | 0.20760908383227  | -3.96172943065968 |
| H  | -3.16323584234275 | 4.33556497378121  | -5.08471456978573 |
| H  | -1.28945089854995 | 3.87474368851180  | -6.63429031554811 |
| H  | -1.45503046690675 | -0.27693050126516 | -5.56618741877125 |
| H  | -0.44449804552918 | 1.56344245440986  | -6.89089936052053 |

**Free ICF<sub>3</sub>**

|   |                   |                   |                   |
|---|-------------------|-------------------|-------------------|
| F | 0.44026521636814  | -1.19007403646809 | -0.38008846116243 |
| F | 0.87315351889000  | 0.92667616882037  | -0.38528968809798 |
| I | -1.97066550349720 | 0.40181786673837  | -0.77163750817477 |
| C | 0.00492990282372  | 0.00113550852453  | 0.02587703840879  |

F -0.02688313458466 0.00625449238483 1.35884861902638

**1-BCl<sub>3</sub>**

B 2.09322752642701 2.29448994193084 -5.68794959374722  
Cl 1.71697957884438 0.97010937798029 -6.90577173194982  
Cl 2.96388512315499 3.70863446960071 -6.47162295305252  
Cl 2.90401784494219 1.68094812833686 -4.17183856977500  
Se 0.01405330804362 2.87122715190359 -5.23535972966038  
C -0.04421433795162 3.83161328521961 -3.64634566593132  
N -1.21206412094374 4.02662518325109 -3.04410721649494  
C -1.41491369266494 5.02290414454658 -1.98999129372551  
C 1.17696974687088 4.35494582618538 -3.01385693075632  
C 2.04493902189190 5.18574290320492 -3.71957694082853  
C 3.21934413902892 5.62543495571793 -3.12668328416660  
C 3.53210725985553 5.24367145433738 -1.82879636813245  
C 2.66574539771597 4.41984891391483 -1.11503262514761  
C 1.49440998893606 3.97434705763938 -1.70463767035065  
C -2.43717285527399 3.37461039200674 -3.49771654525976  
H -2.87137593735832 3.90931083201099 -4.34619842591564  
H -3.14746546606766 3.37276221369773 -2.67274821144990  
H -2.22179671538095 2.35351860920144 -3.80459167444387  
H -2.27699048123380 5.63415705051591 -2.26233244567530  
H -0.54321445516416 5.66015640546089 -1.89423246837789  
H -1.61799213818061 4.53767564712579 -1.03381076609989  
H 1.80663390134656 5.46844588886310 -4.73237575198429  
H 0.83680242601028 3.30341231372882 -1.16626573729903  
H 2.91523106235493 4.10978783060085 -0.10898458388936  
H 3.89523872185758 6.25853444315448 -3.68679381805239  
H 4.45761515293907 5.57508557986387 -1.37537899783376

**1-BCl<sub>3</sub> (TS)**

Cl 0.96410332337115 0.89986727687467 -1.52924516958234  
B -0.12086363872971 -0.05380910668063 -0.53834306264733  
Cl 0.34854049082193 -0.51411804533008 1.08229240246667  
Cl -1.58512319480095 -0.70891822168478 -1.23309203188180  
Se -1.91057926685599 2.41295739338244 0.84234570549939  
C -1.48613973514838 4.15412963166349 1.03869870754056  
N -2.08148609106705 4.95018563646228 2.06516011005491  
C -3.52515877590022 5.11523628417319 1.89190719545079  
C -0.52258330144580 4.85494337300773 0.19309564294465  
C -0.00738097116651 4.27459859259362 -0.97863351817677  
C 0.92759456140236 4.94651389756792 -1.74245247637350  
C 1.36550000903945 6.21400856358892 -1.36202005197490  
C 0.84830314939013 6.81281503251866 -0.21883115872262  
C -0.08444030015134 6.14025112780750 0.55442543561752

|   |                   |                  |                   |
|---|-------------------|------------------|-------------------|
| C | -1.74198517508974 | 4.51641697108668 | 3.42107448491032  |
| H | -2.17609138515223 | 3.53817862739808 | 3.66795490894488  |
| H | -2.11997471440825 | 5.26113478492773 | 4.12248700221142  |
| H | -0.65964029125157 | 4.45557678756122 | 3.52987213317800  |
| H | -4.07615430205595 | 4.18596064991138 | 2.09140329801264  |
| H | -3.74224171424667 | 5.43639833341535 | 0.87351387681450  |
| H | -3.87107261896311 | 5.88814803796754 | 2.57985147567356  |
| H | -0.35987908573301 | 3.29899451945392 | -1.27803245931457 |
| H | -0.49262760674988 | 6.58892303261054 | 1.44729644281452  |
| H | 1.17899509291883  | 7.79950266376870 | 0.07762886368771  |
| H | 1.31160465366165  | 4.48716285581687 | -2.64449214227905 |
| H | 2.10190088831085  | 6.73486130013706 | -1.96156561486914 |

### Free BCl<sub>3</sub>

|    |                  |                  |                   |
|----|------------------|------------------|-------------------|
| B  | 1.97123617797647 | 1.20319538327536 | -5.41024950808264 |
| Cl | 2.14468049239537 | 1.42247149852098 | -7.13460423180454 |
| Cl | 3.05385928494114 | 2.02598914914857 | -4.31547548397333 |
| Cl | 0.71222404468704 | 0.16734396905510 | -4.78367077613949 |

### Partially optimized structures for 1-Me<sup>+</sup>

#### Se-Me distance 2.298

|    |                   |                   |                   |
|----|-------------------|-------------------|-------------------|
| Se | 0.70841945003713  | 0.22925989807614  | -0.02478612269396 |
| C  | 0.24794545782927  | 0.11537419187833  | 2.22334925850205  |
| N  | -0.38101783890338 | 2.17485213741767  | -1.67174438362715 |
| C  | -0.14771316026839 | 1.85580303408134  | -0.42329572654963 |
| C  | -0.55145986258690 | 2.75373697638701  | 0.66969504649258  |
| C  | 0.40276098632150  | 3.39560040416564  | 1.46102575995522  |
| C  | -0.01002737488813 | 4.22376964723816  | 2.49494943459611  |
| C  | -1.36690390115445 | 4.38877809963587  | 2.76069384729447  |
| C  | -2.31723533263497 | 3.73606871311739  | 1.98334279063203  |
| C  | -1.91414952664222 | 2.92777123028289  | 0.93030111370997  |
| C  | -0.81046360358045 | 3.52153848182962  | -2.08718926881423 |
| C  | -0.13250829053889 | 1.24545151745339  | -2.77872221459633 |
| H  | 1.45657464253229  | 3.25341940588862  | 1.25621805682566  |
| H  | 0.72596411671125  | 4.73700239402784  | 3.09863219060578  |
| H  | -1.67941312109316 | 5.02787229988577  | 3.57639558816881  |
| H  | -3.37207855055240 | 3.85475092656963  | 2.19209653553961  |
| H  | -2.65055432388910 | 2.41738692548480  | 0.32278734250158  |
| H  | 0.63782330213605  | -0.86944889861719 | 2.45096895904624  |
| H  | 0.79819118716655  | 0.94069965528852  | 2.65004958744559  |
| H  | -0.82915559085363 | 0.20201816199084  | 2.25800846884123  |
| H  | -0.72754090790313 | 4.21602275585021  | -1.26005505961909 |
| H  | -1.84148655674293 | 3.48607053445522  | -2.43962168136208 |
| H  | -0.16552091959432 | 3.84329865123667  | -2.90434457379189 |
| H  | -0.37469649053068 | 0.22873457432932  | -2.47362698839154 |



|   |                   |                  |                   |
|---|-------------------|------------------|-------------------|
| H | -0.75938683034994 | 1.53107169816110 | -3.61908830819339 |
| H | 0.91527303997302  | 1.29528658388522 | -3.08232965251764 |

**Se-Me distance 2.631**

|    |                   |                   |                   |
|----|-------------------|-------------------|-------------------|
| Se | 0.72571168370800  | 0.23531478072174  | -0.09882373150858 |
| C  | 0.18824052957298  | 0.11740979604981  | 2.47395857199133  |
| N  | -0.38101130800467 | 2.19813550741583  | -1.72078428525361 |
| C  | -0.13129361245637 | 1.86021998033185  | -0.47921607828152 |
| C  | -0.53198540144201 | 2.74293658646642  | 0.63002610229741  |
| C  | 0.42227967985848  | 3.38689103437420  | 1.41938600986712  |
| C  | 0.01092828264113  | 4.19141496419591  | 2.47282423118915  |
| C  | -1.34474284162645 | 4.33427772312879  | 2.75738540094564  |
| C  | -2.29500611321002 | 3.68381851998416  | 1.97826919158423  |
| C  | -1.89326217236565 | 2.89898308367097  | 0.90666471115066  |
| C  | -0.81309142473384 | 3.55077348215685  | -2.11129848926571 |
| C  | -0.14491338150211 | 1.28576523884680  | -2.84355510162806 |
| H  | 1.47526192480617  | 3.25978581508564  | 1.20141874265757  |
| H  | 0.74727244465513  | 4.70539475673134  | 3.07556513775747  |
| H  | -1.65648565071762 | 4.95568313818189  | 3.58702220502717  |
| H  | -3.34903785273641 | 3.78686370925245  | 2.19960287423795  |
| H  | -2.63008456458974 | 2.38984970938578  | 0.29847883575335  |
| H  | 0.63629074342602  | -0.84956835075070 | 2.65495400599957  |
| H  | 0.72397177184345  | 0.99628977607593  | 2.79688970561482  |
| H  | -0.88742418423762 | 0.17400559671066  | 2.40412067554977  |
| H  | -0.72522679319703 | 4.23208103706644  | -1.27380169336117 |
| H  | -1.84622245134950 | 3.52193154641815  | -2.45847628290702 |
| H  | -0.17305612956773 | 3.88657872314775  | -2.92671872614233 |
| H  | -0.36943975732797 | 0.26293272798641  | -2.54521065868921 |
| H  | -0.79203162333902 | 1.57477795739876  | -3.66748668453271 |
| H  | 0.89599820189241  | 1.34964315996619  | -3.16748467005333 |

**Se-Me distance 2.964**

|    |                   |                  |                   |
|----|-------------------|------------------|-------------------|
| Se | 0.71798267281070  | 0.23191662039828 | -0.17703322053334 |
| C  | 0.11927972208854  | 0.14360674992626 | 2.72483357078618  |
| N  | -0.37855499630806 | 2.22469007442637 | -1.77734787847274 |
| C  | -0.12118495428557 | 1.86295733384541 | -0.54343814082860 |
| C  | -0.51538500331327 | 2.72802460897168 | 0.58485616850966  |
| C  | 0.44063764871093  | 3.38627517064159 | 1.35961053731307  |
| C  | 0.03504161524565  | 4.16174306613064 | 2.43727377603370  |
| C  | -1.31643799973615 | 4.26464955253933 | 2.75762246246533  |
| C  | -2.26807426139363 | 3.60468721301127 | 1.98849593473670  |
| C  | -1.87290314381534 | 2.84758409167290 | 0.89425553907161  |
| C  | -0.81135003568205 | 3.58397318831975 | -2.14026185677336 |
| C  | -0.15054853141469 | 1.33071210750495 | -2.91564623487214 |
| H  | 1.49098558341918  | 3.28865021200791 | 1.11605617177422  |

|   |                   |                   |                   |
|---|-------------------|-------------------|-------------------|
| H | 0.77283039848013  | 4.68738073373621  | 3.02834421185778  |
| H | -1.62421019778675 | 4.86533864952504  | 3.60396362901798  |
| H | -3.31904553829812 | 3.68029018957976  | 2.23483850997016  |
| H | -2.61116279695691 | 2.33120766775029  | 0.29394009177551  |
| H | 0.58819699410910  | -0.81576810404218 | 2.88838863397098  |
| H | 0.66234309394363  | 1.04690842258375  | 2.95586549742694  |
| H | -0.94897664952780 | 0.19500081357246  | 2.58117967739209  |
| H | -0.72397523886921 | 4.24850801820408  | -1.28925912483913 |
| H | -1.84444550535100 | 3.56191743845417  | -2.48837926412758 |
| H | -0.17155742944027 | 3.93782178733645  | -2.94831039201183 |
| H | -0.37480346455112 | 0.30379539143769  | -2.63090261433919 |
| H | -0.80185963553817 | 1.63388605855180  | -3.73122090098135 |
| H | 0.88881765346024  | 1.39643294391412  | -3.24401478432267 |

#### Se-Me distance 3.298

|    |                   |                   |                   |
|----|-------------------|-------------------|-------------------|
| Se | 0.67712617586480  | 0.21289993713052  | -0.26258678117222 |
| C  | 0.07451162646150  | 0.16785870935318  | 2.97920474200315  |
| N  | -0.37707305447445 | 2.25434347362840  | -1.83592000292797 |
| C  | -0.12527889755320 | 1.85958041666868  | -0.61069259995469 |
| C  | -0.51004413953798 | 2.70404803716540  | 0.53850955388207  |
| C  | 0.44862599084455  | 3.37639289445749  | 1.29727041602415  |
| C  | 0.05197311663881  | 4.12999460461645  | 2.39386049061418  |
| C  | -1.29349712524488 | 4.19995043382549  | 2.74685880355813  |
| C  | -2.24759688150580 | 3.52818566939199  | 1.99112719161914  |
| C  | -1.86199425026207 | 2.78960058217525  | 0.88052501603567  |
| C  | -0.80060075429879 | 3.62429089276801  | -2.16609946405621 |
| C  | -0.15556579064478 | 1.38318095135553  | -2.99259284322974 |
| H  | 1.49500516416173  | 3.30450873220776  | 1.02938545416402  |
| H  | 0.79225036151174  | 4.66761116745706  | 2.97120753001077  |
| H  | -1.59553580392780 | 4.78624845182912  | 3.60534109953098  |
| H  | -3.29447794060452 | 3.58119236546256  | 2.26046621431531  |
| H  | -2.60273908076716 | 2.26543405164233  | 0.29027835090841  |
| H  | 0.56650206351659  | -0.78085345966218 | 3.13987134310492  |
| H  | 0.62040195564252  | 1.08864267760166  | 3.12251029144626  |
| H  | -0.99202517767646 | 0.20175961644205  | 2.81438122149043  |
| H  | -0.70889317586229 | 4.26820410251394  | -1.29971679211347 |
| H  | -1.83368285625124 | 3.61777132124104  | -2.51522650451250 |
| H  | -0.15811441869475 | 3.99382317691997  | -2.96497131995613 |
| H  | -0.39952052583545 | 0.35415751291945  | -2.73228163406966 |
| H  | -0.79547322432102 | 1.71602269403140  | -3.80563816706507 |
| H  | 0.88735664282038  | 1.43734098685746  | -3.31136160964993 |

#### Se-Me distance 3.631

|    |                  |                   |                   |
|----|------------------|-------------------|-------------------|
| Se | 0.70051291680090 | 0.27147065340055  | -0.30747924525064 |
| C  | 0.13200647120187 | -0.02835050520070 | 3.26615012597197  |

|   |                   |                   |                   |
|---|-------------------|-------------------|-------------------|
| N | -0.39682859844384 | 2.28932602318899  | -1.88568795371902 |
| C | -0.12695861637074 | 1.89902940912769  | -0.66175849175105 |
| C | -0.51349526523848 | 2.73569861699828  | 0.49214350903667  |
| C | 0.44786626560418  | 3.37321185278219  | 1.27800717476539  |
| C | 0.04902534066795  | 4.13174856258415  | 2.36996217275970  |
| C | -1.30152673507803 | 4.23933967450227  | 2.69308635493411  |
| C | -2.25912064297374 | 3.59976866845602  | 1.91335041652979  |
| C | -1.87006859940905 | 2.85617847919972  | 0.80807850260179  |
| C | -0.83032529154026 | 3.65517663588937  | -2.21598364191543 |
| C | -0.17069533653828 | 1.41932602931035  | -3.04168025480295 |
| H | 1.49672567728917  | 3.27467546548796  | 1.02976404779228  |
| H | 0.79066643487504  | 4.64594857296323  | 2.96650162654387  |
| H | -1.60462084054868 | 4.83068112925254  | 3.54772490015872  |
| H | -3.30948923183560 | 3.68089458115270  | 2.16095086965642  |
| H | -2.61203894751413 | 2.35569442166062  | 0.19930132959710  |
| H | 0.73342353755241  | -0.92331476620070 | 3.34065049905569  |
| H | 0.58798876281235  | 0.94038875504890  | 3.41193825590412  |
| H | -0.93610547344105 | -0.10289976444139 | 3.12510363239943  |
| H | -0.74586092213734 | 4.29979763741567  | -1.34925006127853 |
| H | -1.86257401841196 | 3.64199070270328  | -2.56750871428847 |
| H | -0.18905973082062 | 4.03049531308204  | -3.01336949016598 |
| H | -0.39748545540303 | 0.38748305398716  | -2.77746999665254 |
| H | -0.81990026895186 | 1.74159195440432  | -3.85167510907453 |
| H | 0.86957856785280  | 1.48683884324478  | -3.36714045880794 |

**Se-Me distance 3.964**

|    |                   |                   |                   |
|----|-------------------|-------------------|-------------------|
| Se | 0.67944712017072  | 0.32992715819590  | -0.32011663966132 |
| C  | 0.18771843143591  | -0.29377373232051 | 3.56380846657765  |
| N  | -0.40380284302072 | 2.33217799925476  | -1.93809839237761 |
| C  | -0.13609264317458 | 1.94825766140232  | -0.71150802468699 |
| C  | -0.52423861923130 | 2.78768368101437  | 0.43981424486471  |
| C  | 0.43575477886381  | 3.43766935941575  | 1.21828210798485  |
| C  | 0.03462007362118  | 4.20269686483501  | 2.30427901733687  |
| C  | -1.31567625174923 | 4.30093975282601  | 2.63123373028742  |
| C  | -2.27187362132658 | 3.64543931757056  | 1.86150234903346  |
| C  | -1.88130022497398 | 2.89637191496366  | 0.76196435556517  |
| C  | -0.84033117207521 | 3.69474903649941  | -2.27458536773116 |
| C  | -0.17451014669460 | 1.45597516135345  | -3.08826485261484 |
| H  | 1.48405270777905  | 3.34399326962165  | 0.96587678455181  |
| H  | 0.77342578920297  | 4.72744789498121  | 2.89509248136986  |
| H  | -1.61991963300177 | 4.89712853895509  | 3.48199148372867  |
| H  | -3.32164801686025 | 3.71923593010540  | 2.11376739221519  |
| H  | -2.61989979429266 | 2.38168689630549  | 0.16098749755979  |
| H  | 0.74570326681860  | -1.21804616106563 | 3.50572105070729  |
| H  | 0.70444438710586  | 0.63314159641430  | 3.76790487868446  |

|   |                   |                   |                   |
|---|-------------------|-------------------|-------------------|
| H | -0.88809045991838 | -0.30302104496781 | 3.46595676591132  |
| H | -0.76091723809664 | 4.34264899642900  | -1.40958355564416 |
| H | -1.87146788305783 | 3.67796440178751  | -2.62931466995317 |
| H | -0.19769444702123 | 4.07052652118983  | -3.07074916651302 |
| H | -0.39226742215390 | 0.42436710982991  | -2.81645238738234 |
| H | -0.82821671762091 | 1.76809836692564  | -3.89876114046558 |
| H | 0.86442057927166  | 1.52890350847770  | -3.41703840934835 |

### ICF<sub>3</sub><sup>+</sup>·ICH<sub>3</sub>

|   |                   |                   |                   |
|---|-------------------|-------------------|-------------------|
| I | -0.79790801727323 | -0.32802747798119 | 1.78125092026511  |
| C | 0.07507921298842  | 0.19647939376679  | -0.14131201719458 |
| F | 0.98695870568453  | 1.16328673607830  | 0.00829398926492  |
| F | 0.67671795642972  | -0.85937998243432 | -0.69643915012007 |
| F | -0.86098719549002 | 0.63427161322336  | -0.98757396471092 |
| I | -1.73046486310623 | -0.96071312778116 | 5.29981372368359  |
| C | 0.19810072031786  | -0.06158351516796 | 5.65615955993165  |
| H | 0.94823504828480  | -0.78887269213673 | 5.36896157634676  |
| H | 0.25157337443720  | 0.17487185537233  | 6.71298661270503  |
| H | 0.25169505772692  | 0.82966719706058  | 5.04185874982840  |

### Free ICH<sub>3</sub>

|   |                   |                   |                  |
|---|-------------------|-------------------|------------------|
| I | 0.00002696774473  | 0.00000001526192  | 3.75242754735217 |
| C | -0.00004355316341 | -0.00000000383521 | 5.90989082137353 |
| H | 1.03450983208507  | -0.00000002995087 | 6.23384025034636 |
| H | -0.51724660069432 | -0.89596262955836 | 6.23392074294110 |
| H | -0.51724664597207 | 0.89596264808252  | 6.23392063798683 |

## References

- [1] P. Thordarson, *Chem. Soc. Rev.* **2011**, *40*, 1305–1323.
- [2] R. Wagner, S. Berger, *J. Magn. Reson. Ser. A* **1996**, *123*, 119–121.
- [3] J. Jeener, B. H. Meier, P. Bachmann, R. R. Ernst, *J. Chem. Phys.* **1979**, *71*, 4546–4553.
- [4] N. M. Alexej Jerschow, *J. Magn. Reson.* **1997**, *375*, 372–375.
- [5] R. Mills, *J. Phys. Chem.* **1973**, *77*, 685–688.
- [6] A. Macchioni, G. Ciancaleoni, C. Zuccaccia, D. Zuccaccia, *Chem. Soc. Rev.* **2008**, *37*, 479–489.
- [7] G. Ciancaleoni, A. Macchioni, L. Rocchigiani, C. Zuccaccia, *RSC Adv.* **2016**, *6*, 80604–80612.
- [8] M. P. Mitoraj, A. Michalak, T. Ziegler, *J. Chem. Theory Comput.* **2009**, *5*, 962–975.
- [9] R. F. Nalewajski, J. Mrozek, A. Michalak, *Int. J. Quantum Chem.* **1997**, *61*, 589–601.
- [10] R. F. Nalewajski, J. Ozek, *Int. J. Quantum Chem.* **1994**, *51*, 187–200.

[11] R. F. Nalewajski, A. M. Köster, K. Jug, *Theor. Chim. Acta* **1993**, 85, 463–484.
